# 1 The intrinsically disordered N-terminus of the voltage- 2 dependent anion channel

3 Jordane Preto<sup>a\*</sup>, and Isabelle Krimm<sup>a,b</sup>

4 <sup>a</sup>Université Claude Bernard Lyon 1, Centre de Recherche en Cancérologie de Lyon, Centre  
5 Léon Bérard, INSERM 1052, CNRS 5286, Lyon, France

6 <sup>b</sup>CRMN, Université de Lyon, CNRS 5280, ENS de Lyon, 5 Rue de La Doua, F-69100, Vil-  
7 leurbanne, France.

8 \* Corresponding author. E-mail: [jordane.preto@univ-lyon1.fr](mailto:jordane.preto@univ-lyon1.fr)

9

10 **Abstract.** The voltage-dependent anion channel (VDAC) is a critical  $\beta$ -barrel membrane pro-  
11 tein of the mitochondrial outer membrane, which regulates the transport of ions and ATP be-  
12 tween mitochondria and the cytoplasm. In addition, VDAC plays a central role in the control  
13 of apoptosis and is therefore of great interest in both cancer and neurodegenerative diseases.  
14 Although not fully understood, it is presumed that the gating mechanism of VDAC is governed  
15 by its N-terminal region which, in the open state of the channel, exhibits an  $\alpha$ -helical structure  
16 positioned midway inside the pore and strongly interacting with the  $\beta$ -barrel wall.

17 In the present work, we performed molecular simulations with a recently developed force  
18 field for disordered systems to shed new light on known experimental results, showing that the  
19 N-terminus of VDAC is an intrinsically disordered region (IDR). First, simulation of the N-  
20 terminal segment as a free peptide highlighted its disordered nature and the importance of using  
21 an IDR-specific force field to properly sample its conformational landscape. Secondly, accel-  
22 erated dynamics simulation of a double cysteine VDAC mutant under applied voltage revealed

23 metastable low conducting states of the channel representative of closed states observed exper-  
24 imentally. Related structures were characterized by partial unfolding and rearrangement of the  
25 N-terminal tail, that led to steric hindrance of the pore. Our results indicate that the disordered  
26 properties of the N-terminus are crucial to properly account for the gating mechanism of  
27 VDAC.

28

29 **Author summary.** The voltage-dependent anion channel (VDAC) is a membrane protein play-  
30 ing a pivotal role in the transport of ions or ATP across the mitochondrial outer membrane as  
31 well as in the induction of apoptosis. At high enough membrane potential, VDAC is known to  
32 transition from an open state to multiple closed states, reducing the flow of ions through the  
33 channel and blocking the passage of large metabolites. While the structure of the open state  
34 was resolved more than a decade ago, a molecular description of the gating mechanism of the  
35 channel is still missing. Here we show that the N-terminus of VDAC is an intrinsically disor-  
36 dered region and that such a property has a profound impact on its dynamics either as a free  
37 peptide or as part of the channel. By taking disordered properties of the N-terminus into ac-  
38 count, we managed to generate long-lived closed conformations of the channel at experimental  
39 values of the membrane potential. Our results provide new insights into the molecular mecha-  
40 nism driving the gating of VDAC.

41

## 42 **1. Introduction**

43 The voltage-dependent anion channel (VDAC) is a major porin located in the mitochondrial  
44 outer membrane (MOM). One of VDAC's main function is to mediate the transport of ions or  
45 small metabolites such as ATP, ADP or NADH between the mitochondrial intermembrane  
46 space (IMS) and the cytoplasm thus contributing to cell homeostasis (1). In addition, the chan-  
47 nel is responsible for alteration of the permeability of the MOM which may result, under

48 specific stimuli, to the release of apoptogenic factors like cytochrome C from the IMS, even-  
49 tually leading to apoptosis (2). Through its ability to interact with a dozen different proteins –  
50 including itself – VDAC was shown to either induce or inhibit apoptosis depending on its in-  
51 teraction partner (2). For this reason, VDAC is usually considered a promising target not only  
52 for cancer treatment but also in neurodegenerative diseases where the main goal is to prevent  
53 early stages of neuron's death (3).

54 Single-channel conductance experiments have revealed that VDAC can either be found  
55 in an open, high conducting, state prevailing at low membrane potential (between  $-30$  mV  
56 and  $30$  mV) or in multiple closed, low conducting, states occurring at more extreme voltage  
57 (above or below  $\pm 30$  mV) (4, 5). Importantly, anion selectivity can be fairly high in the open  
58 state with an anion/cation ratio of 5-6 at 150-mM KCl concentration while closed states were  
59 reported to be cation selective (5, 6). Although the structure of the open state of VDAC was  
60 resolved more than a decade ago, little is known regarding the structure of the closed states due  
61 to their transient properties in normal conditions (4).

62 Experimental structures of the open state of VDAC were first released in 2008 by three  
63 separate groups using X-ray crystallography and/or NMR (7-9). VDAC is composed of 19  $\beta$ -  
64 strands forming the barrel as well as an  $\alpha$ -helical N-terminus (residues M1 to G25) located  
65 midway inside the pore and interacting with the barrel mostly via hydrophobic contacts (Fig  
66 1). While the structure of the  $\beta$ -barrel was similar in all cases, slight differences in the position  
67 and in the  $\alpha$ -helical content of the N-terminus, i.e., long helix vs. small helix vs. helix-break-  
68 helix, were observed between published structures (10). Although the N-terminus was reported  
69 to be stable in the open state (no large conformational change on the sub-millisecond timescale  
70 (11)), these slight variations may be an indicator of local flexibility of that region on longer  
71 timescales or different arrangements due to external conditions such as lipid environment (10).  
72 The mobility of the N-terminus was confirmed in a wide range of biophysical studies

73 suggesting that the segment could detach from the pore and even translocate outside the chan-  
74 nel during voltage gating (12). Nevertheless, N-terminal translocation does not seem to be re-  
75 quired for gating as several experimental studies introducing a disulfide bridge to “lock” the  
76 N-terminus against the  $\beta$ -barrel wall showed that closed states may still arise when the segment  
77 is located inside the pore (13, 14). Such studies include that of Teijido and al. (14) where the  
78 introduction of an S-S bond at L10C-A170C was found to have no effect on the conductance  
79 profile of the channel confirming that closure can still be induced without any large conforma-  
80 tional change of the N-terminus.

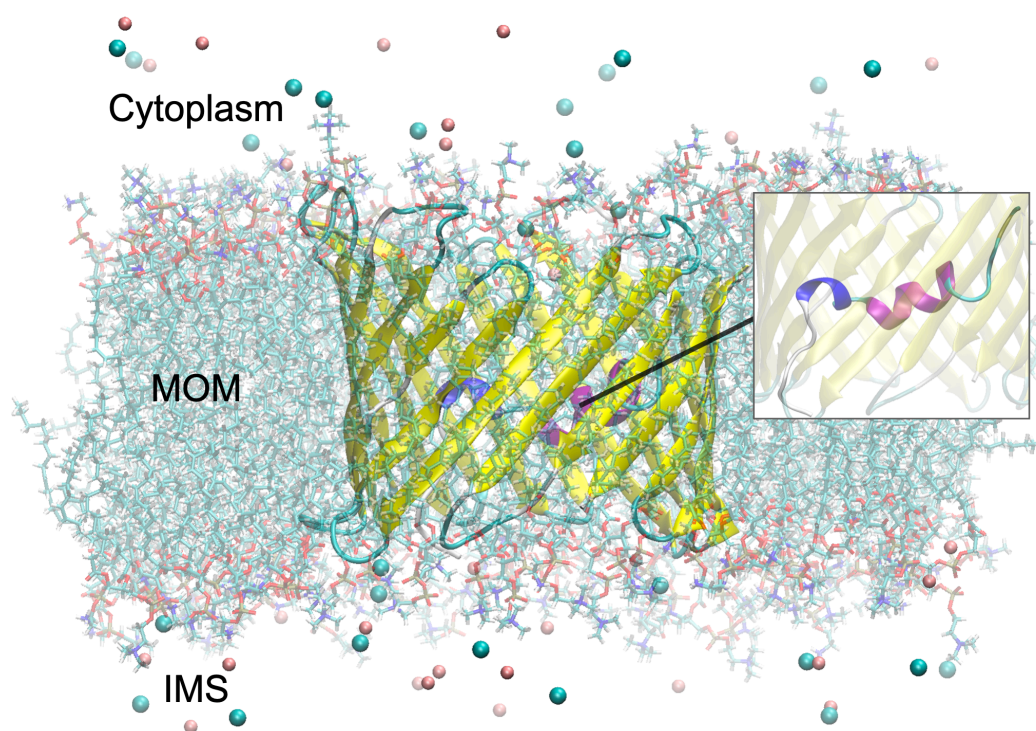

81  
82 **Fig 1. VDAC embedded in a lipid bilayer.** The structure of the murine VDAC1 (mVDAC1) solved by X-  
83 ray crystallography was used (PDB ID: 3EMN (9)). The inset shows a closer view of the N-terminal region  
84 with the  $3_{10}$ -helix involving Y7, A8 and D9, depicted in dark blue, and the standard helix (K12 to T19) in  
85 fuchsia. Chloride (in blue-green) and potassium ions (in pink) are also shown at a 150-mM KCl concentra-  
86 tion for illustrative purposes. The MOM as well as expected cytoplasm and IMS sides are also indicated.

87 Finally, important structural properties of the N-terminus of VDAC were discovered by  
88 De Pinto and coworkers (15, 16). Using NMR and circular dichroism (CD) experiments, the

89 authors found that the N-terminal fragment, when produced as a free peptide in solution, was  
90 characterized by no apparent structural content. From molecular dynamics (MD) simulations,  
91 it was proposed that such a peptide could exist in a dynamic equilibrium alternating between  
92 random coil and  $\alpha$ -helix content while interaction of the N-terminal region with the inner part  
93 of the VDAC barrel would “choose” the  $\alpha$ -helix conformation over unstructured ones (16).

94 In the present paper, it is shown that the lack of apparent structure experimentally ob-  
95 served by De Pinto and coworkers is a simple illustration of the disordered nature of the N-  
96 terminus which, in our opinion, has not properly been investigated until now. By running MD  
97 simulations with a force field specifically designed for intrinsically disordered regions (IDR),  
98 we showed that the conformational landscape of the N-terminal peptide is mostly unstructured  
99 in solution with almost no helical content. Alternatively, simulation with a standard force field  
100 similar to what has been used in previous in silico studies, was found to overstabilize its  $\alpha$ -  
101 helix content leading to erroneous results. Our findings were confirmed by the ability of the  
102 IDR force field to reproduce experimental  $C\alpha$  and  $C\beta$  chemical shifts both qualitatively and  
103 quantitatively, in contrast to the standard force field.

104 In the second part, we explored the importance of the disordered properties of the N-  
105 terminus in the gating mechanism of VDAC. Specifically, experiments by Teijido et al. (14)  
106 were modeled by introducing a disulfide bond between residues L10C and A170C. Using the  
107 IDR-specific force field, accelerated dynamics trajectories at  $\pm 40$  mV voltage were character-  
108 ized by the unfolding of the  $3_{10}$ -helix involving residues Y7, A8 and D9 and subsequent rear-  
109 rangements of disordered residues M1 to D9. At +40 mV, the unfolded segment was found to  
110 unwind and to move towards the middle of the pore leading to steric hindrance of the channel.  
111 Metastable states displaying a low conductance representative of closed states (~50-60% of the  
112 conductance in the open state) as well as a reduced anion selectivity, were observed. Specific  
113 positioning of the unfolded N-terminal segment in our metastable states as well as the inability

114 for standard force fields to induce stable low-conducting states suggest that the disordered  
115 properties of the N-terminus are critical to account for the closing mechanism of VDAC. Alt-  
116 hough our subconducting states were generated at +40mV, the exact role of the membrane  
117 potential in channel closure, as compared with random voltage-independent events, is still to  
118 be determined.

119

## 120 **2. Results**

### 121 **2.1 The N-terminal peptide**

122 We first investigated the disordered properties of the N-terminal peptide in solution. Starting  
123 from the  $\alpha$ -helical N-terminus (M1-G25) directly extracted from the crystal structure of  
124 mVDAC1 (9) (PDB ID: 3EMN), we performed  $\mu$ s-long MD simulations using, on one side,  
125 the Amber ff14SB force field which is considered one of the standard and latest benchmarks  
126 for protein simulations (17) and, on the other side, the ff14IDPSFF force field that was specif-  
127 ically designed to sample disordered protein domains (18). Importantly, ff14IDPSFF was re-  
128 ported to produce results similar to ff14SB in the case of well-folded systems (18).

129 Representative conformers of the N-terminal peptide obtained after running standard MD  
130 with the ff14SB and ff14IDPSFF force fields are shown in Fig 2 (top). Long MD trajectories  
131 of 1.6  $\mu$ s and 2.1  $\mu$ s were run with ff14SB and ff14IDPSFF, respectively, while convergence  
132 was confirmed in both cases as the number of clusters generated from clustering analysis was  
133 found to plateau in the last 500 ns (S1 Fig). Notably, important differences in the conforma-  
134 tional landscapes of the two force fields were observed. Whereas dynamics performed with  
135 ff14SB was mostly characterized by  $\alpha$ -helices involving residues Y7 to K20, simulation with  
136 the ff14IDPSFF force field led to unstructured conformations including partially as well as  
137 fully unfolded structures. To get further insight into the stability of each state, the potential of  
138 mean force (PMF) was provided (S2 Fig) as a function of the RMSD with respect to the crystal

139 structure and the radius of gyration ( $R_g$ ), two popular collective variables for structural analysis  
 140 of small peptides (19). As depicted in Fig 2 and S2 Fig, transient secondary structures were  
 141 also identified using ff14IDPSFF including small antiparallel  $\beta$ -strands made of A2-V3 and  
 142 Y22-G23 (RMSD $\sim$ 11.5 Å,  $R_g\sim$ 8.5 Å) as well as an  $\alpha$ -turn involving D9, L10 and G11  
 143 (RMSD $\sim$ 9 Å,  $R_g\sim$ 9 Å). The latter was found to minimally contribute to the overall conforma-  
 144 tional ensemble (1.24%).

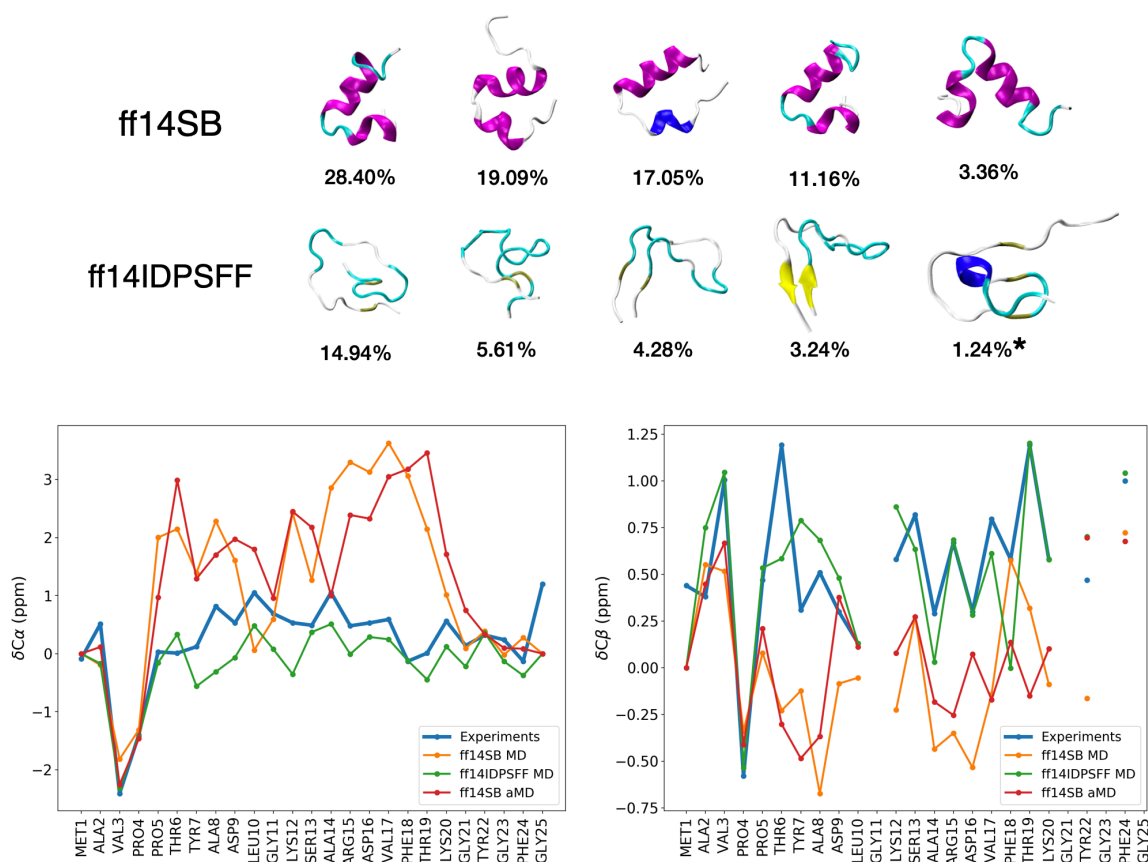

145  
 146 **Fig 2. Representative conformers and chemical shifts of the N-terminal peptide.** Top: representative  
 147 conformers of the top 5 clusters (and their occupancy) obtained from  $\mu$ s-long simulations with ff14SB and  
 148 ff14IDPSFF. Note that the last (starred) structure shown for ff14IDPSFF corresponds to the 12<sup>th</sup> most pop-  
 149 ulated cluster which is the first cluster with  $\alpha$ -helical content. Bottom:  $\alpha$ - and  $\beta$ -carbon chemical shifts of  
 150 the N-terminal peptide predicted from molecular simulations and experiments (experimental values were  
 151 directly extracted from Table S1 in Ref. (16)). Shifts computed from MD simulations were obtained by  
 152 simple average of the shifts predicted for each generated structure using the SPARTA+ software (20). Shifts

153 computed from aMD simulations were calculated as weighted averages using Maclaurin series up to rank  
154  $k=10$  in order to approximate the weights (Eq. (4)).

155 Although our simulations were  $\mu$ s-long and convergence was reached in all cases, we  
156 explored the possibility that dynamics carried out with ff14SB could produce other conformations of the peptide (over longer timescales) with no  $\alpha$ -helical content. To this purpose, we  
157 used accelerated Molecular Dynamics (aMD), a biasing technique originally developed by the  
158 McCammon group (21). aMD has been successfully applied to a vast diversity of systems including the 58-residue pancreatic trypsin inhibitor whereby 500-ns-long aMD simulation allowed to sample conformations normally reachable on the millisecond timescale (22). Hence,  
161 aMD turns out to be a method of choice to investigate the conformational landscape of our 25-residue peptide more thoroughly.

164 Overall, the conformational landscape generated from a 1 $\mu$ s-long aMD simulation with  
165 ff14SB was similar to the  $\alpha$ -helix ensemble generated from standard MD using the same force  
166 field, with no new basin or new structural content reported (S3 Fig). To eliminate the possibility  
167 that our simulations could have been biased by our choice of starting structure, i.e., the  $\alpha$ -  
168 helical N-terminus extracted from mVDAC1, which may have led to the peptide being  
169 “trapped” in an  $\alpha$ -helix minimum, we also ran a short aMD simulation (20 ns) starting from a  
170 fully unfolded structure ( $R_g \sim 20$  Å). This time was short enough to observe clear convergence  
171 to the main  $\alpha$ -helix basin found in our long simulation suggesting that further stable or metastable regions with ff14SB were unlikely (S3 Fig).

173 Finally, we investigated the correctness of our results by estimating the NMR chemical  
174 shifts of alpha and beta carbons from each simulation and by comparing those values with  
175 experimental ones reported elsewhere (16). Results are provided in Fig 2 (bottom) for both  
176 ff14SB and ff14IDPSFF force fields where the former is given in cases of standard MD and  
177 aMD simulations. Notably,  $C\alpha$  and  $C\beta$  chemical shifts predicted using ff14SB were found to



178 be very far from experimental data (chemical shifts obtained from MD and aMD simulations  
179 were similar, which is consistent with the similar landscapes observed). Discrepancies were  
180 especially visible for  $\alpha$ -helix residues confirming the tendency of ff14SB to overstabilize sec-  
181 ondary structures in disordered systems (23). Conversely, both  $C\alpha$  and  $C\beta$  shifts computed  
182 from the ff14IDPSFF trajectory showed great agreement with experiments. From S1 Table, we  
183 can see that the improvement was both quantitative and qualitative as low RMSE values and  
184 high Pearson correlation coefficients (0.870 for  $C\alpha$  and 0.759 for  $C\beta$ ) were obtained, respec-  
185 tively.

## 186 **2.2 The N-terminus in VDAC**

187 Here we explored the stability of the intrinsically disordered N-terminus as part of the open  
188 state of VDAC. MD simulations of mVDAC1 were performed at physiological salt concentra-  
189 tion (150 mM KCl) starting from the 3EMN structure (9) embedded in a DOPC/DOPE mem-  
190 brane (Fig 1). As with the N-terminal peptide, standard MD was performed with ff14IDPSFF  
191 and compared to simulations using the ff14SB force field. Since ff14IDPSFF has not yet been  
192 tested on proteins interacting with lipids, the new force field parameters were only applied to  
193 the N-terminal region which is located inside the pore, while ff14SB was always used to model  
194 the rest of the channel.

195 In Fig 3, we showed the root mean square fluctuations (RMSF) of N-terminal residues  
196 over 100 ns while the inset displays the N-terminal RMSD as a function of time. At first glance,  
197 we noticed that both force fields resulted in almost equally-rigid N-terminal regions (RMSD <  
198 2 Å) although many residues including L10 to D16 and Y22 to G25 had a slightly higher RMSF  
199 in the case of ff14IDPSFF. Interestingly, this increase in flexibility was not necessarily corre-  
200 lated with the ability of secondary structures to unfold. For example, the secondary structure  
201 propensity obtained with ff14IDPSFF in the long  $\alpha$ -helix (K12 to T19) was equal or even

202 higher than the propensity calculated with ff14SB (S4 Fig). On the opposite, the  $3_{10}$ -helix in-  
203 volving Y7, A8 and D9 which is characteristic of the 3EMN structure, was slightly less stable  
204 in the case of ff14IDPSFF (0.86 and 0.76 propensity for ff14SB and ff14IDPSFF, respectively).

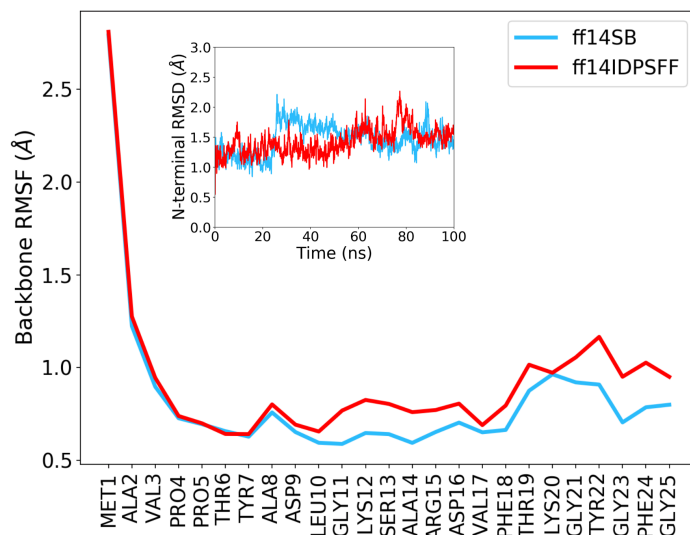

205  
206 **Fig 3. RMSF and RMSD of the N-terminus of wild-type mVDAC1.** RMSF and RMSD were computed  
207 from 100-ns-long runs using ff14SB or ff14IDPSFF. Only the backbone atoms of the N-terminus were con-  
208 sidered for the calculation of RMSF. Inset: N-terminal RMSD with respect to the 3EMN structure as a func-  
209 tion of time. RMSD values were calculated by first aligning the structures over all the heavy atoms including  
210 atoms of the pore and of the N-terminus.

211 Overall, we found that the ff14IDPSFF force field predicted a stable and well-folded N-  
212 terminal region within the timeframe of our standard MD run (650 ns, see S2 Table) with no  
213 apparent transition or change in structural content compared to the 3EMN structure (S1 Video).  
214 Not only is this result consistent with experiments showing the stability of the N-terminus in  
215 the open state of VDAC (24) but it also confirms the ability of ff14IDPSFF to model stable  
216 IDRs as they fold upon interaction with other protein domains.

### 217 2.3 Double cysteine mutant

218 To investigate the closing mechanism of VDAC, simulations of a double cysteine mutant  
219 (mVDAC1-Cys) characterized by a disulfide bond connecting residues L10C and A170C, were

220 performed. Electrophysiological measurements by Teijido et al. (14) have revealed that this  
221 modification was not altering the gating properties of the channel even though the N-terminus  
222 was affixed against the barrel. Therefore, such a setup provides a good way to investigate clo-  
223 sure of VDAC from molecular simulations as the presence of the S-S bond should dramatically  
224 restrict the exploration of the conformational space of the N-terminus, thereby saving a lot of  
225 computational time. In addition, our results should confirm that closure of the channel is not  
226 necessarily induced by large conformational changes of that region.

227 All our simulations were initiated from the 3EMN structure where we mutated residues  
228 L10 and A170 to create the disulfide bond. Since L10 and A170 were already spatially close  
229 to each other in 3EMN (min. interatomic distance  $\sim 3.9$  Å), the mutated channel was found to  
230 relax to a state similar to the crystal structure (Fig 4). As with mVDAC1 WT, standard MD  
231 runs – using either ff14SB or ff14IDPSFF – were unsuccessful in simulating conformational  
232 transitions of the N-terminus or the barrel. Therefore, aMD simulations were carried out. Three  
233 membrane potentials: 0 mV, +40mV and –40 mV, at 150 mM KCl, were considered (one  
234 aMD trajectory per potential). Voltage was defined as positive when it was greater at the side  
235 opposite to the ends of N- and C-termini in the open state. Importantly, this side was found to  
236 correlate with the cytosolic side of the channel that was also shown to correspond to the *cis*  
237 side in planar lipid bilayer (PLB) experiments (25, 26). Therefore, the potential values speci-  
238 fied in the present work most likely represent potential values set at the *cis* side in PLB exper-  
239 iments while setting the *trans* side to 0 mV.

240 aMD simulations were conducted over hundreds of nanoseconds at each voltage (a sum-  
241 mary of our simulations including simulation times, is given in S2 Table). While trajectories  
242 generated with ff14SB revealed no major displacements or structural changes of the N-termi-  
243 nus at 0 mV or at applied potential (S2 Video), simulations with ff14IDPSFF showed more  
244 complex dynamics depending on the voltage: aMD trajectories at +40 mV and –40 mV were

245 both characterized by early unfolding of the  $3_{10}$ -helix involving residues Y7, A8 and D9 (after  
246 20 ns at +40 mV and after 2 ns at -40 mV). At 0 mV, the  $3_{10}$ -helix was more stable although  
247 our aMD trajectory also led to unfolding of this region after 160 ns (S3 Video) suggesting that  
248 such an event may not be fully induced by the membrane potential. Despite unfolding of the  
249 helix, position and orientation of the N-terminus including those of the N-terminal tail (M1 to  
250 T6) remained globally unchanged at 0 mV (S5 Fig) as evidenced by hydrogen bonds between  
251 M1 and E121, A2 and H122, or P4 and N124 prevailing all along our simulation.

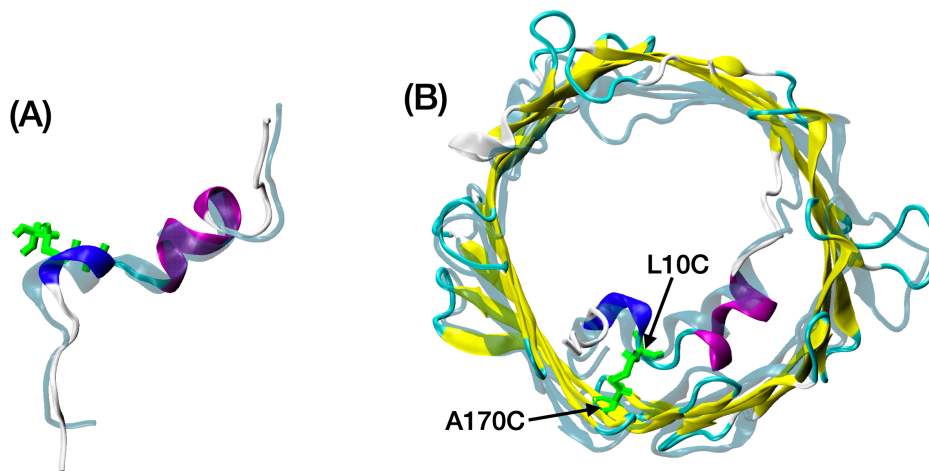

252  
253 **Fig 4. mVDAC1-Cys structure relaxed from 3EMN.** mVDAC1-Cys conformation obtained after 10-ns-  
254 long equilibration of the (mutated) 3EMN crystal structure using ff14IDPSFF. The crystal structure is de-  
255 picted in transparent turquoise. Disulfide bridge linked L10C and A170C residues are shown in green. (A)  
256 N-terminal region (side view); (B) whole channel (IMS view; the IMS is expected to correspond to the *trans*  
257 side in PLB experiments).

258 Contrary to the 0 mV case, our +40 mV aMD trajectory showed a detachment of the N-  
259 terminal tail from the barrel whereby residues M1 to P5 moved towards the middle of the pore  
260 around 140 ns (S4 Video). At this stage, the tail was found to either interact with the  $\beta$ -barrel  
261 at strands 4 and 5 (hydrogen bonds at M1-E84, A2-E84), move almost freely or interact with  
262 other residues of the N-terminus (hydrogen bonds at M1-D9 and A2-Y7) indicative of a high  
263 flexibility of that region (S5 Fig). At -40 mV, we noticed that the N-terminal tail remained in

264 a more “packed-up” conformation (S5 Video, S5 Fig). Although residue M1 was found to in-  
265 teract electrostatically with E121 just as in the 0 mV case, hydrogen bonds and hydrophobic  
266 contacts between residues T6, Y7, A8 and strands 7 and 8 were also reported, which led to  
267 slight apparent distortion of the barrel in the region of interaction (Cluster #1 in S5 Fig). Re-  
268 markably, while the  $3_{10}$ -helix experienced unfolding and subsequent repositioning at different  
269 voltages, the long  $\alpha$ -helix made of residues K12 to T19 always remained stable and well-folded  
270 with a position similar to that of the crystal structure (S5 Fig).

271 To investigate whether any of the conformations generated from aMD could correspond  
272 to closed states of VDAC, we performed grand canonical Monte Carlo/Brownian dynamics  
273 (GCMC/BD) which enable to rapidly simulate the flow of ions across membrane channels (27)  
274 GCMC/BD has been successfully applied to porin systems (28) including the open state of  
275 VDAC (29). In GCMC/BD, only ions are explicitly simulated while the rest of the system  
276 including the protein and the membrane, is modeled as a fixed continuous dielectric. In the  
277 present study, clustering analysis was carried out on each aMD trajectory (0 mV, +40 mV and  
278 -40 mV) by generating 500 clusters in each case. Next, independent GCMC/BD trajectories  
279 were run at 150-mM KCl from the representative structure of each cluster to approximate the  
280 conductance and anion/cation ratio of each state. Estimates were obtained by running  
281 GCMC/BD at a single voltage value for each frame (at +40 mV for frames generated at  
282 +40 mV and 0 mV, and at -40 mV for frames extracted from the -40 mV trajectory).

283 From this approach, we observed that the conductance of the channel remained globally  
284 stable at 0 mV with an average value of 0.918 nS and few conformations below 0.6 nS (S6  
285 Fig). Importantly, this mean value was relatively close to the experimental conductance value  
286 of the open state of 0.81 nS at 150-mM KCl concentration (6). As another remark, no visible  
287 change in the conductance was reported after unfolding of the  $3_{10}$ -helix (160 ns) confirming  
288 that the channel was still in its open state after such an event. Regarding the anion/cation ratio,

289 experiments have estimated it to be around 5-6 in the open state of VDAC1 WT at 150 mM  
290 KCl (6). In our simulation, large fluctuations of this ratio, characterized by high values ( $> 40$ )  
291 and an average value of 14, were reported. We speculate that such high ratios are due to the  
292 small number of cations crossing the pore during our GCMC/BD runs (often less than 5), which  
293 are expected to lead to an overestimation of the anion selectivity in the open state.

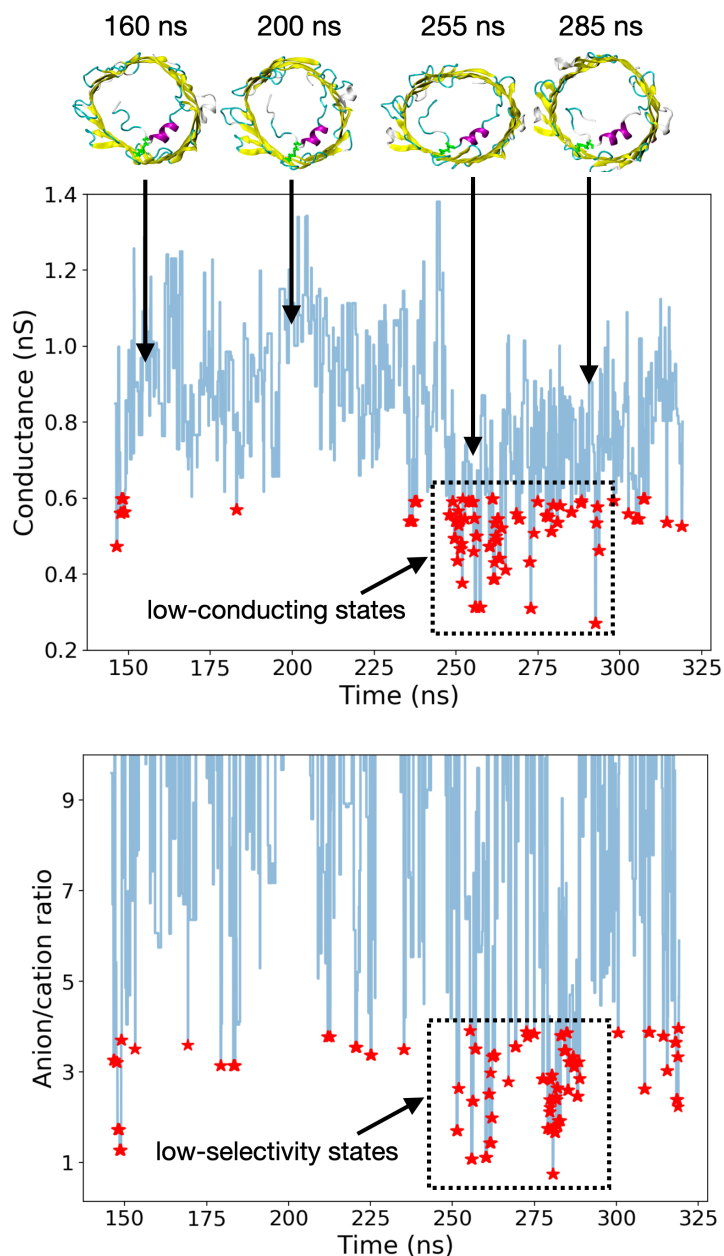

294

295 **Fig 5. Conductance and anion/cation ratio of mVDAC1-Cys structures generated at +40mV.** All val-

296 ues were estimated from GCMC/BD simulations at +40mV (150 mM KCl) performed on 500 representative

297 structures of our +40mV aMD trajectory (once the N-terminal tail has detached and moved inside the barrel  
298 (~140 ns)). Time series curves were reconstructed by assigning the same conductance and anion/cation ratio  
299 to all the frames of a given cluster. Red stars correspond to all the frames with a conductance less than 0.6  
300 nS or an anion/cation ratio less than 4.

301 At +40 mV, our GCBC/BD runs revealed a drop in the conductance at about 250 ns in  
302 our aMD simulation with many structures below 0.6 nS (Fig 5), where 0.6 nS corresponds to  
303 65.3% of the conductance measured at 0 mV. At this stage, the N-terminus was characterized  
304 by a zigzag unfolded segment (from M1 to D9) located midway inside the pore and interacting  
305 with the  $\beta$ -barrel mostly via hydrophobic contacts (Fig 5, Cluster #5 in S5 Fig). The drop in  
306 the conductance was coupled by a significant decrease in the anion/cation ratio with values less  
307 than 3 as well as a few structures exhibiting slight cation selectivity. From 280 ns, conductance  
308 slowly increased again which happened when the tail detached again from the barrel. Unlike  
309 the +40 mV case, our GCBC/BD simulations performed on our -40 mV aMD trajectory did  
310 not show any long-lived subconducting state although a few transient conformations  
311 characterized by both a low conductance and reduced anion selectivity or even cation  
312 selectivity were observed (S6 Fig).

## 313 2.4 Closed state(s)

314 To investigate the stability of the subconducting conformers generated from aMD at +40mV,  
315 standard MD simulations were performed. Out of the 500 representative structures tested using  
316 GCMC/BD, 51 frames were predicted to have a conductance less than 0.6 nS between 240 ns  
317 and 290 ns (red stars in the dashed rectangle in Fig 5 (top)) and were therefore used as starting  
318 point for 200-ns-long MD runs at +40mV (one trajectory per conformer). For each trajectory,  
319 the electric current was estimated by monitoring the total number of ions crossing the channel  
320 and by estimating the slope of the *crossing-events-vs-time* curve from linear regression. As is  
321 well known, standard MD tends to overestimate the diffusion coefficient of ions in explicit

322 solvent (29). Hence, a multiplicative factor based on both experimental and simulated bulk  
323 diffusion coefficients of potassium chloride was used to compute the current (see section 4.8).  
324 As a control, our approach was applied to a 450-ns-long MD trajectory of our initial mVDAC1-  
325 Cys structure equilibrated from 3EMN (Fig 4). The predicted current was 34.98 pA at +40mV  
326 resulting in an (approximated) conductance of 0.87 nS which is well in line with the experi-  
327 mental value of 0.81 nS reported in the open state. At the same time, the anion/cation ratio was  
328 found to be 5.96 at the end of the simulation which is also quite consistent with the 5-6 ratio  
329 observed in experiments.

330       Regarding our subconducting conformers, a summary of the results is provided in S3  
331 Table. Among the 51 structures, five were shown to exhibit both a low conductance (around  
332 0.6 nS or less) and a reduced anion/cation ratio (around 4 or less). With a pairwise RMSD of  
333 1.76 Å, two of the five conformers were found to correspond to the same structural state now  
334 referred to as S1 state, while the remaining three also belonged to the same S2 state (see S7  
335 Fig). Since the S1 state displayed a lower apparent conductance ( $\sim 0.5$  nS) and anion/cation  
336 ratio ( $< 3$ ) than S2, we chose to investigate the former more thoroughly by extending the tra-  
337 jectory of one such conformer up to 450 ns at +40mV and by comparing the results with those  
338 of the open state. The number of crossing events as well as the anion/cation ratio are shown in  
339 Fig 6 for the open and S1 states. In both cases, we noticed that the number of crossing events  
340 described an almost straight line as a function of time confirming the stability of each state in  
341 terms of conductivity. The ratio of crossing events between S1 and the open state was 96/167  
342  $\sim 57.5\%$ , at the end of the simulation which falls within the range of conductance ratios reported  
343 experimentally and is consistent with our previous GCMC/BD runs. The anion/cation ratio in  
344 S1 was also in line with our GCMC/BD simulations (2.7 at 450 ns) indicating a higher prefer-  
345 ence for cations although no full cation selectivity was observed (the ratio was always greater  
346 than 1).



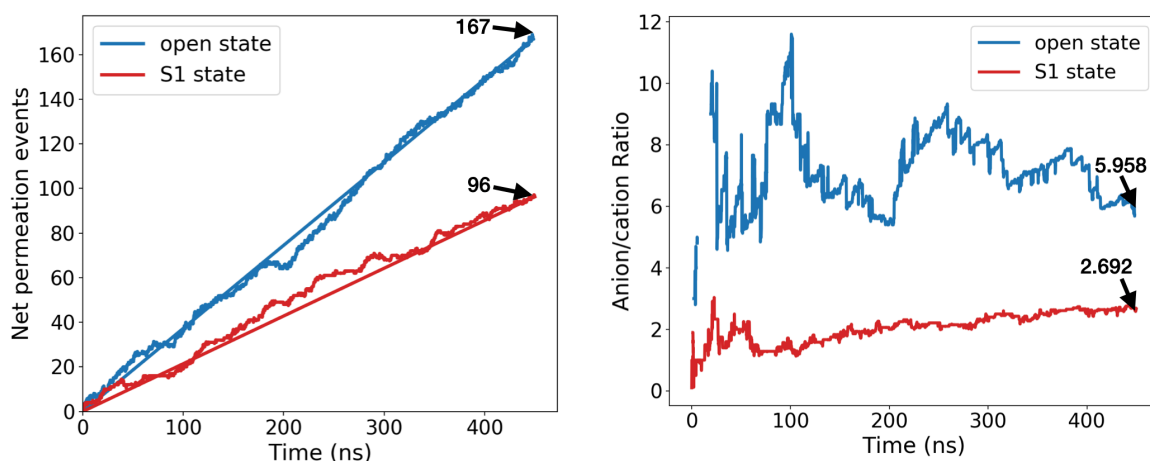

347

348 **Fig 6. Net permeation events and anion/cation ratio in mVDCA1-Cys open state and subconducting**  
349 **S1 state.** Values were obtained from 450-ns-long standard MD trajectories at +40mV. In the figure showing  
350 net permeation events, the line connecting the first and last points was plotted, the slope of which can be  
351 used to estimate the electric current (section 4.8).

352 Finally, we explored the structural origin of the low conductance and anion/cation ratio  
353 in the S1 state. Note that our 450-ns-long MD trajectories of the open and S1 states can be seen  
354 from S6 and S7 Videos, respectively. Interestingly, the trajectory of the S1 state revealed a  
355 flexible N-terminal tail (M1 to P5) with different positions and orientations: e.g., the segment  
356 was initially pointing toward the cytosolic side while it was more oriented toward the IMS at  
357 the end of the trajectory. As the electric current was found to be stable until the end of the  
358 simulation (Fig 6), this suggests that residues M1 to P5 are unlikely to fully account for the  
359 low conductance. Alternatively, subsequent residues (T6 to D9) always displayed a stable un-  
360 folded horizontal position (see also S8 Fig) interacting with the  $\beta$ -barrel via hydrophobic con-  
361 tacts whereas the rest of the N-terminus (C10 to G25) was structurally similar to that of the  
362 open state (Fig 7 (A)). Involvement of residues T6 to D9 in the electric current flow was also  
363 visible from the density profile of chloride permeation events. This density profile is shown in  
364 Fig 7 (B) and Fig 7 (C) as a cross section made of all the (x, y) positions of Cl<sup>-</sup> ions reaching  
365 the middle of the channel. From these figures, we noticed that residues of the unfolded N-

366 terminal segment obstructed the pore in a steric way in the S1 state as illustrated by the com-  
367 plete disappearance of an anion density peak located close to the 3<sub>10</sub>-helix in the open state.

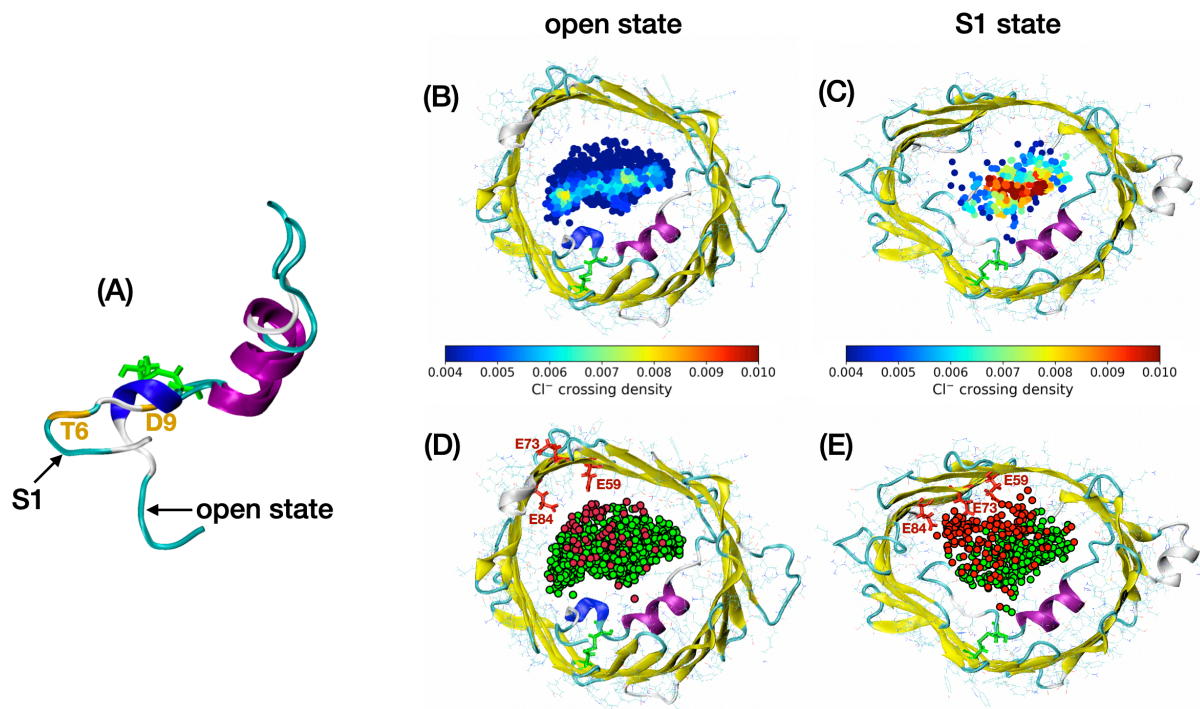

368

369 **Fig 7. Open state and subconducting S1 state of mVDCA1-Cys.** (A) side view of the N-terminal region.

370 (B, C): density profile of chloride ions crossing the middle of the channel in the open state (B) and S1 state

371 (C). Crossing events were collected from our 450-ns-long MD trajectories. Note that the density was nor-

372 malized with respect to the total number of Cl<sup>-</sup> crossing events in each case (which is about twice as small

373 as in S1). (D, E): positions of potassium ions (in red) and chloride ions (in green) crossing the middle of the

374 channel in the open state (D) and S1 state (E). The open and S1 conformations correspond to representative

375 structures extracted from each MD trajectory. Disulfide bridge linked L10C and A170C residues are shown

376 in green while E59, E73 and E84 residues are colored in red.

377 Regarding anion selectivity: since the N-terminus was found to block an anion-enriched

378 region within the pore in S1, it was reasonable to observe a decrease in the anion/cation ratio

379 as well. However, our subconducting trajectory also revealed an increase in cation crossing

380 events with respect to the open state (Fig 7 (D) and Fig 7 (E)). In both states, cations were

381 mostly localized close to the barrel wall opposite to the long helix of the N-terminus as was

382 also reported in previous in silico studies (30). Importantly, this region was found to correlate

383 with the positions of three negatively charged residues, namely, E59, E73 and E84, located  
384 next to each other on three consecutive strands ( $\beta 3$ ,  $\beta 4$  and  $\beta 5$ ). In S1, the  $K^+$  density became  
385 higher in this area where we noticed that the side chain of E73 had shifted into the pore while  
386 originally pointing toward the membrane (Fig 7 (E)). Notably, E73's reorientation initially oc-  
387 curred in our +40mV aMD trajectory at 70 ns (i.e., before detachment of the N-terminal tail)  
388 but was not observed in our aMD runs at 0 mV or -40mV. In this configuration, the side chains  
389 of three consecutive residues T72, E73, K74 are facing the pore region which may seem unex-  
390 pected as consecutive residues in  $\beta$ -sheets usually alternate between each side of the protein  
391 backbone. However, E73's new orientation remained unchanged until the end of our aMD tra-  
392 jectory as well as in subsequent hundreds-ns-long MD simulations at +40mV confirming its  
393 stability at this voltage. Although E73 reoriented early on in our aMD trajectory, decrease in  
394 anion selectivity was only observed for a few specific conformers (Fig 4 bottom) suggesting  
395 that reorientation of E73 was not sufficient to guarantee cation preference.

### 396 **3. Discussion**

397 In the present study, the intrinsically disordered nature of the N-terminus of VDAC as well as  
398 its importance in the gating mechanism of the channel were explored. Although not fully  
399 acknowledged until now, several arguments in favor of an intrinsically disordered N-terminal  
400 segment in VDAC can be put forward: (i) using NMR and CD techniques, De Pinto and  
401 coworkers have shown that a free peptide corresponding to such a domain mostly exists as a  
402 random coil in solution (15, 16). As the N-terminus of VDAC is known to translocate out of  
403 the pore of the channel in specific environmental conditions (12), it was suggested that N-  
404 terminal unstructured properties were essential in the interaction of VDAC with other proteins  
405 (16); (ii) closer look at the sequence of the N-terminal domain reveals that 13 (out of 25) resi-  
406 dues belong to the well-known eight disordered-promoting residues, namely, G, A, S, P, R, Q,  
407 E and K. Such residues were originally identified from analysis of various X-ray, NMR and

408 CD data, as being more prevalent in disordered segments (31). In VDAC, disordered-promot-  
409 ing residues specifically include A8, G11, K12, S13, A14 and R15, six amino acids involved  
410 in the  $\alpha$ -helix domain of the N-terminus in the open state; (iii) application of disorder-predic-  
411 tion software like s2D (32) or ESpritz (33) predicted that the N-terminus of VDAC1 was es-  
412 sentially disordered although the s2D method also revealed a propensity of residues K12 to  
413 T19 to form helices (S9 Fig). In the case of ESpritz, all the N-terminal residues were predicted  
414 to be disordered (i.e., they were all classified as “D”) irrespective of the choice of the training  
415 set (X-ray or DisProt); (iv) a feature of many disordered systems is that they can fold into  
416 different structures when binding to other proteins or protein domains (34). Interfaces which  
417 are crucial to stabilize secondary structures were reported to be significantly more hydrophobic  
418 than those of globular protein complexes (35). In the open state of VDAC, the vast majority of  
419 interactions between the helical N-terminus and the  $\beta$ -barrel are non-polar (9). These include  
420 the well-known hydrophobic interactions between L10 and V143-L150 that was shown to be  
421 highly conserved across species (8, 9).

422 Along with the above arguments, further evidence of the disordered properties of the N-  
423 terminus of VDAC was provided in the present work where MD performed with the IDR-  
424 specific ff14IDPSFF force field enabled to reproduce experimental chemical shifts of the free  
425 N-terminal peptide while the standard ff14SB force field was unsuccessful in doing so. From  
426 a structural point of view, simulations with ff14SB were characterized by a significant amount  
427 of helical content that was most likely responsible for the large deviation from experimental  
428 values. Importantly, the tendency of popular force fields to overstabilize secondary structures  
429 in disordered systems is not new and is due to force field parameters, especially dihedral cor-  
430 rection terms, which are normally calibrated from databases of well-folded proteins (36-38).  
431 Such force fields include ff14SB, CHARMM27 and ff99SB which have been extensively used  
432 in previous in silico studies on VDAC (16, 39-41). Conversely, our simulation with the IDR-

433 specific force field showed almost no  $\alpha$ -helical content in the free peptide aside from a small  
434  $\alpha$ -turn made of D9, L10 and G11. The complete absence of an  $\alpha$ -helical segment similar to the  
435 one observed in the crystal structures of VDAC indicates that the  $\alpha$ -helix pattern specific of  
436 the open state is formed via induced folding through interaction with the  $\beta$ -barrel and not via  
437 conformational selection as previously presumed (16). Moreover, the ability of ff14IDPSFF to  
438 properly simulate well-folded systems was confirmed by our MD simulations of mVDAC1 in  
439 its open state whereby the N-terminus remained stable all along a 650-ns-long trajectory. Aside  
440 from ff14IDPSFF, other force fields have been recently developed to account for intrinsic dis-  
441 ordered segments in proteins such as the CHARMM36m force field (42) although their level  
442 of accuracy may vary depending on the system being studied (43). Therefore, application of  
443 other force fields to VDAC's N-terminus should require preliminary validation, e.g., from a  
444 comparison with experimental chemical shifts as we have done in the present work.

445 In the second part, we investigated whether the disordered properties of the N-terminus  
446 were of importance for the gating mechanism of VDAC. This was done by running aMD sim-  
447 ulations on a double cysteine mutant (mVDAC1-Cys) characterized by a disulfide bridge con-  
448 necting residues L10C and A170C. As shown by Teijido et al. (14), such a setup enabled to  
449 induce closed states of the channel while affixing part of the N-terminus against the barrel, thus  
450 restricting the exploration of the conformational landscape. Just like the free peptide, striking  
451 differences between the ff14SB and ff14IDPSFF force fields were noticed. Whereas the N-  
452 terminus of VDAC with ff14SB was insensitive to a +40 mV voltage (no conformational or  
453 structural change observed), aMD simulation with ff14IDPSFF showed that the N-terminal tail  
454 (M1 to T6) could detach from the  $\beta$ -barrel subsequent to unfolding of the  $3_{10}$ -helix (Y7, A8  
455 and D9). The tail was found to move further inside the pore while the long  $\alpha$ -helix (K12 to  
456 T19) remained folded and stably interacting with the barrel all along our simulation. As the N-  
457 terminal peptide was shown to lose its secondary structure in solution, the stability of the long

458 helix in mVDAC1-Cys may be explained by the presence of the C10-C170 disulfide bond  
459 whereby residues K12 to T19 are constrained to interact with the barrel thus preserving helical  
460 content in this region. Next, using GCMC/BD simulations performed on representative struc-  
461 tures generated using ff14IDPSFF, we managed to identify a large number of conformers char-  
462 acterized by a low conductance (~50-60% or below of the conductance in the open state).

463 Stability of our subconducting conformers was further investigated by running hundreds-  
464 ns-long standard MD trajectories using each structure as a starting point. From our analysis,  
465 we identified five frames showing long-lived subconducting behavior together with a reduced  
466 anion/cation ratio. The five frames were found to be divided into two different structural states,  
467 namely, S1 and S2, characterized by different arrangements of the unfolded M1-C10 segment  
468 although, in both cases, the segment was interacting with the barrel midway inside the pore.  
469 Remarkably, our stable subconducting structures were all reported to match either the S1 or S2  
470 states suggesting that the low conductance was mainly due to the specific positioning of the N-  
471 terminus even though such arrangements may have a structural impact on the rest of the chan-  
472 nel. For example, we observed that the S2 state exhibited slightly higher ellipticity than S1 or  
473 the open state (mean ellipticity values were estimated at 0.182, 0.165, 0.143 in S2, S1 and open  
474 states trajectories, respectively). While more thorough investigation might be needed to explore  
475 whether the ellipticity is partly responsible for the low conductance, the observed increase in  
476 S2 is still well below that of semicollapsed states reported in (11). Nevertheless, given the  
477 multiplicity of VDAC closed states, we leave open the possibility that other stable closed states  
478 with higher ellipticity could exist.

479 Aside from ellipticity measurements, we also started to explore the structural origin of  
480 the low conductance and the higher cation preference in the S1 state. Closer look at Cl<sup>-</sup> ions  
481 crossing the middle of the pore indicated that the unfolded T6-D9 segment of the N-terminus  
482 further reduced the opening of the pore as compared with the open state. The T6-D9 segment

483 remained stable mostly because of hydrophobic contacts with the barrel as shown in S10 Fig.  
484 Interestingly, an increase in cation crossing events was also reported in S1 which contributed  
485 to lowering the anion/cation ratio. We observed that K<sup>+</sup> ions were mostly concentrated close  
486 to a negatively charged motif made of residues E59, E73 and E84 where E73's side chain was  
487 found to face the pore region. From our analysis, we were, however, unable to determine the  
488 exact involvement of E73 in cation permeation or whether E73's reorientation was favored by  
489 our membrane potential. Noticeably, a stable salt bridge involving E84 and K115 was found in  
490 the S1 state (S10 Fig) which could also contribute to stabilizing cation-friendly pathways.  
491 Regarding cation selectivity, which seems to be typical of closed states in VDAC1 WT (5, 6),  
492 none of S1 or S2 were reported to have a anion/cation ratio less than 1. This result may be due  
493 to the presence of the disulfide bond which prevents further rearrangement of the N-terminus  
494 required for a full cation selectivity (40). For the record, mVDAC1-Cys was found to exhibit  
495 typical gating profile in terms of conductance (14), yet no measurement of the anion/cation  
496 ratio was reported that could confirm cation preference of closed states in that case.

497 Finally, although S1 and S2 were generated from aMD at +40mV, we cannot rule out the  
498 possibility that such states may take place through random voltage-independent events. To  
499 investigate the specificity of S1 at positive voltage, five 200-ns-long additional trajectories  
500 were run at 0mV, +40mV and -40mV. In each trajectory, the RMSD of the T6-D9 segment  
501 with respect to our S1 state was computed since T6-D9 was observed to partially block the  
502 chloride flux in S1. At +40 mV, 1 trajectory out of 5 was reported to reach conformers similar  
503 to S1 (RMSD < 3.0 Å) whereas no such trajectories were found at 0 mV or -40 mV (RMSD >  
504 4.0 Å). Even though our results might indicate that S1 is typical of a positive voltage, further  
505 analysis is required to confirm the real impact of the membrane potential. Another possible  
506 scenario being that a high enough voltage, either positive or negative, would be especially  
507 important to make the N-terminus unfold (even partially) or detach from the barrel, and that

508 transitions to the multiple closed states would arise in a more random way given the higher  
509 flexibility of the unfolded N-terminus. In that case, structurally-similar subconducting states  
510 may emerge regardless of the positivity of the voltage. Validation of one model over the other  
511 is beyond the scope of the present study whose primary objective was to point out that  
512 metastable subconducting states of VDAC, originating from the disordered properties of its N-  
513 terminus, can prevail at realistic voltage values.

514

## 515 **4. Material and Methods**

### 516 **4.1 MD software and force fields**

517 All our MD simulations, including standard and aMD simulations, were performed using the  
518 Amber16 package (45). The ff14SB force field (17), which is known as the latest Amber force  
519 field benchmark for proteins simulations is directly available from the Amber package while  
520 the ff14IDPSFF force field (18) was obtained from direct request to Prof. Ray Luo's group.  
521 ff14IDPSFF can also be downloaded from the Precise Force Field and Bioinformatics Labor-  
522 atory website: [http://cbb.sjtu.edu.cn/~hfchen/index\\_en.php](http://cbb.sjtu.edu.cn/~hfchen/index_en.php).

### 523 **4.2 Structure preparation (peptide)**

524 The N-terminal peptide was obtained by extracting the N-terminal region (M1-G25) from the  
525 mVDAC1 structure in the open state (PDB ID: 3EMN (9)). Protonation of the peptide was  
526 done using the PropKa algorithm from the MOE 2018 software at a neutral pH (46). Using the  
527 Amber's LEaP module, the system was set into an octahedral box filled with TIP3P waters  
528 requesting at least a 15 Å distance between any atom of the peptide and the box edges. Overall,  
529 8826 water molecules were incorporated into the simulation box. Sodium and chloride ions  
530 were added to neutralize the system as well as to approximate a 0.01M concentration consistent  
531 with experimental conditions used for NMR chemical shifts measurements (16). Both ff14SB



532 and ff14IDPSFF simulations of the N-terminal peptide were based on the above preparation  
533 protocol. However, setting up ff14IDPSFF simulations further required to generate a new to-  
534 pology file containing the proper force field parameters (dihedral correction terms). This was  
535 done by running the Trans\_FF\_IDPs.pl script available with the ff14IDPSFF force field using,  
536 as an input, the ff14SB topology file generated from the LEaP module (45). For each force  
537 field, equilibration of the solvated structure was performed with the Amber's pmemd utility by  
538 first minimizing the whole system (peptide and solvent) during 5000 steps using the steepest  
539 descent method followed by 5000 steps of conjugate gradient. Next, simulations in the NVT  
540 ensemble were carried out for 500 ps by slowly heating the system from 0K to 298K while  
541 restraining heavy atoms of the peptide. Lastly, NPT simulations at  $P = 1$  bar and  $T = 298$ K  
542 were run without restraints during 500 ps to finalize the equilibration process.

### 543 **4.3 Production MD (peptide)**

544 Unbiased MD production was conducted during 1.6  $\mu$ s and 2.1  $\mu$ s using the ff14SB and  
545 ff14IDPSFF force field, respectively. aMD simulations performed with the ff14SB force field  
546 were run during 1  $\mu$ s. Details regarding the aMD method and our protocol are given below.  
547 Additional aMD simulations starting from a fully unfolded structure of the peptide were run  
548 using the ff14SB force field during 20 ns, which was found to be enough to reach the  $\alpha$ -helix  
549 basin. In that case, the initial conformation was simply extracted from our ff14IDPSFF simu-  
550 lation by selecting the structure with maximum radius of gyration ( $\geq 20$  Å).

### 551 **4.4 Accelerated MD**

552 To efficiently sample the conformational space of the N-terminal peptide and of mVDAC1-  
553 Cys, aMD simulations were run. Briefly, aMD is based on adding a non-negative biasing po-  
554 tential (boost) to the system whenever the system potential is less than an energy threshold (47)

$$V'(\mathbf{x}) = V(\mathbf{x}) \quad \text{when } V(\mathbf{x}) \geq E \quad (1)$$

$$V'(\mathbf{x}) = V(\mathbf{x}) + \Delta V(\mathbf{x}) \quad \text{when } V(\mathbf{x}) < E,$$

555 where  $V(\mathbf{x})$  is the true MD potential,  $\Delta V(\mathbf{x})$  is the aMD boost and  $E$  is the energy threshold.  
556 The addition of the  $\Delta V(\mathbf{x})$  term is done in such a way as to reduce the height of local energy  
557 barriers, and is therefore dependent on the energy of the system at  $\mathbf{x}$ . In the present work, aMD  
558 was run in its dual boost version, i.e., the aMD boost is the sum of two biasing contributions:  
559 one acting on all atoms (including solvent atoms) through the total potential energy  $V(\mathbf{x})$ , and  
560 the other one acting only on dihedral angles through the dihedral energy  $V_d(\mathbf{x})$  such that:

$$\Delta V(\mathbf{x}) = \frac{(E_p - V(\mathbf{x}))^2}{\alpha_p + E_p - V(\mathbf{x})} + \frac{(E_d - V_d(\mathbf{x}))^2}{\alpha_d + E_d - V_d(\mathbf{x})} \quad (2)$$

561 Here  $E_p$  and  $E_d$  correspond to the average (total) potential and dihedral energies of the biased  
562 simulations, respectively, whereas  $\alpha_p$  and  $\alpha_d$  are coefficients accounting for the contribution  
563 of each biasing term. Following standard aMD protocols (22, 48), the above coefficients were  
564 computed from the following formulas:

$$E_p = E_{p,0} + \gamma_p \cdot n_{atoms}, \quad \alpha_p = \gamma_p \cdot n_{atoms} \quad (3)$$

$$E_d = E_{d,0} + \gamma_d \cdot n_{residues} + \gamma'_d \cdot n_{lipids}, \quad \alpha_d = 0.2(\gamma_d \cdot n_{residues} + \gamma'_d \cdot n_{lipids}),$$

565 where  $\gamma_p = 0.16$  kcal/mol/atom,  $\gamma_d = 3.5$  kcal/mol/residue and  $\gamma'_d = 30.0$  kcal/mol/  
566 lipid.  $n_{atoms}$ ,  $n_{residues}$  and  $n_{lipids}$  are the number of atoms (including solvent atoms), the  
567 number of residues (25 in the case of the peptide) and the number of lipids, respectively.  $E_{p,0}$   
568 and  $E_{d,0}$  are the average potential and dihedral energies of the unbiased system, respectively,  
569 that were estimated from direct analysis of our equilibration simulations in the NPT ensemble.

#### 570 4.5 aMD reweighting

571 An important feature of aMD is the possibility to recover ensemble averages associated with  
572 the true MD profile. As is well known, structures generated from a biased (equilibrated) simu-  
573 lation characterized by a biasing potential  $\Delta V(\mathbf{x})$  can be assigned a weight  $w(\mathbf{x})$  accounting  
574 for how they really contribute to the unbiased free energy. This weight is given by the Boltz-  
575 mann factor:  $w(\mathbf{x}) = e^{\Delta V(\mathbf{x})/k_b T}$  that enables to compute the average of any collective variable  
576  $\xi(\mathbf{x})$  as

$$\langle \xi \rangle = \frac{1}{\sum_i w(\mathbf{x}_i)} \sum_i w(\mathbf{x}_i) \xi(\mathbf{x}_i) \quad (4)$$

577 where  $\mathbf{x}_i$  are the coordinates of the structures generated through the biased simulation. Notably,  
578 the exponential factors can be expressed as a Maclaurin series (49) such that:

$$w(\mathbf{x}) = \sum_{k=0}^{\infty} \frac{1}{k!} (\Delta V(\mathbf{x})/k_b T)^k \quad (5)$$

579 In practice, finite sampling leads to small errors in the distribution of the  $\Delta V(\mathbf{x}_i)$  while  
580 high-order terms in the above series contribute to increase that noise. Therefore, it is of com-  
581 mon practice to approximate the weights  $w(\mathbf{x})$  by keeping only low-order terms. In this work,  
582 all averages quantities deduced from our aMD simulations, including chemical shift estima-  
583 tions, were computed from Eqs. (4) and (5) by keeping only terms up to  $k = 10$ . Although  
584 widely accepted, we have tested the applicability of the mentioned formulas on a toy model –  
585 alanine dipeptide in explicit solvent – by confirming that averages of  $\varphi, \psi$  dihedral angles of  
586 the peptide from aMD data could well reproduce averages obtained from standard MD (not  
587 shown).

#### 588 **4.6 Chemical shifts**

589  $C\alpha$  and  $C\beta$  chemical shifts were calculated using the SPARTA+ software (20) which relies on  
590 a neural network algorithm to predict the shifts from an input protein structure. The high

591 execution speed of the program enabled to compute the chemical shifts for each structure saved  
592 throughout our MD or aMD simulations (one structure saved every 2 ns). Standard averages  
593 of each chemical shift – or weighted averages in the case of aMD data – were computed from  
594 those predictions and directly compared with experimental data (Table S1 in Ref. (16)).

#### 595 **4.7 Structure preparation (channel)**

596 Structures of mVDAC1 and mVDAC1-Cys were prepared from the 3EMN crystal structure by  
597 aligning the protein to its corresponding *Orientation of Protein in Membranes* (OPM) structure  
598 (50). This enabled to translate the system so that its center of mass was positioned at the origin  
599 and the pore was oriented along the z axis. In the case of mVDAC1-Cys, the MOE program  
600 (46) was used to mutate residues L10 and A170 into cysteines and to create the disulfide bond.  
601 The channel was then embedded into a DOPC/DOPE membrane using the CHARMM-GUI  
602 membrane builder webserver (51). A rectangular simulation box with TIP3P water was con-  
603 sidered. The membrane was built following a 2:1 PC:PE ratio as it was shown to be representa-  
604 tive of the lipid composition of the MOM (52). Lipids were positioned in such a way as to  
605 roughly cover a  $90 \times 90 \text{ \AA}^2$  surface in x and y directions which resulted in 186 lipid molecules.  
606 Thickness of water layers on both sides of the membrane was set to  $22.5 \text{ \AA}$  creating around  
607 12500 water molecules in the box. Protonation of protein residues was performed with the  
608 membrane builder tool. As suggested in Ref. (41), the E73 residue was kept in its unprotonated  
609 form although it was initially facing the membrane. A 150-mM KCl concentration was applied  
610 in all our simulations. Finally, equilibration protocol involving minimization, NVT and NPT  
611 steps, was similar to the one used for the free peptide except NPT equilibration was run during  
612 5 ns (mVDAC1) or 10 ns (mVDAC1-Cys) using an anisotropic pressure scaling as is required  
613 for membrane systems. See “structure preparation (peptide)” for other parameter values.

#### 614 **4.8 Production MD (channel)**

615 All production runs of wild-type mVDAC1 were performed in the NPT ensemble while those  
616 related to mVDAC1-Cys were conducted in NVT starting from structures equilibrated in NPT.  
617 All our runs were simulated at 150-mM KCl concentration. A summary of our exploratory MD  
618 and aMD simulations is provided in S2 Table. Transmembrane (TM) potential was modeled  
619 by applying an external electric field along the z-axis using Amber's "efz" parameter. Voltages  
620 include 0 mV, +40 mV and -40 mV. The reason for running production in NVT was due to  
621 the inability of the Amber package to account for virial contribution in NPT upon application  
622 of an external field. To investigate the conductance and the stability of mVDAC1-Cys' open  
623 state as well as of the 51 subconducting conformers generated from aMD, 200-ns-long standard  
624 MD trajectories were run at +40mV using each structure as a starting point (one trajectory per  
625 conformer). The starting structure in the open state corresponds to our initial structure after 10  
626 ns equilibration in NPT (section 4.7). To estimate the electric current, linear regression of the  
627 net ion crossing events as a function of time was performed. Since the diffusion coefficient of  
628 ions is usually overestimated in MD (29), we first computed the bulk diffusion coefficient of  
629 potassium chloride at 10 mM as predicted from standard simulation in TIP3P water. A 750-ns-  
630 long trajectory involving 8 K<sup>+</sup> and 8 Cl<sup>-</sup> ions in a box containing around 36700 water molecules  
631 resulted in a KCl diffusion coefficient  $D_{sim} = 3.273 \cdot 10^{-5} \text{cm}^2/\text{s}$  ( $R^2 = 0.99$ ) whereas the real  
632 diffusion coefficient is known to be  $D_{exp} = 1.918 \cdot 10^{-5} \text{cm}^2/\text{s}$  at the same KCl concentration  
633 (53). The  $D_{exp}/D_{sim}$  ratio was then used as a multiplicative factor to estimate the current from  
634 the slope of the *crossing-events-vs-time* curve.

#### 635 **4.9 GCMC/BD**

636 Poisson-Boltzmann and Poisson-Nernst-Planck (PB/PNP) and GCMC/BD calculations were  
637 run using the open-source PB/PNP and GCMC/BD programs available at [http://www.charmm-  
gui.org/?doc=input/gcmcdbd](http://www.charmm-<br/>638 gui.org/?doc=input/gcmcdbd). For more details about the PB/PNP and GCMC/BD protocols, see

639 Refs. (27, 54). GCMC/BD simulations were carried out on representative frames of our aMD  
640 trajectories of mVDAC1-Cys at 0 mV, +40 mV and -40 mV. RMSD clustering analysis was  
641 performed from the full trajectory generated at 0 mV, from 140 ns at +40 mV, i.e., when the  
642 N-terminal tail has moved inside the barrel, and from 300 ns at -40 mV. In all cases, 500  
643 clusters resulting in 500 frames were generated. Next, the CHARMM-GUI Ion Simulator web-  
644 server (55) was used to generate all the input files needed for PB/PNP and GCMC/BD calcu-  
645 lations. Each structure was embedded into a 35-Å-thick membrane oriented along the z-axis  
646 and positioned in the middle of an 85 x 85 x 95 Å<sup>3</sup> box. Thickness of buffer regions at the top  
647 and bottom of the simulation box were set to 5 Å while a fixed concentration of 150mM KCl  
648 was used on both sides of the membrane. PB/PNP was carried out prior to GCMC/BD in order  
649 to estimate the protein electrostatic and steric potentials at each point of a rectangular grid with  
650 a grid spacing of 0.5 Å. These values are used in GCMC/BD simulations. Each GCMC/BD run  
651 was performed by conducting one GCMC step every BD step for a total of  $5 \times 10^7$  BD cycles.  
652 Values reported in Fig 5 and S6 Fig were obtained by averaging over 3 independent GCMC/BD  
653 replicas. The TM voltage was set to +40 mV for frames extracted from aMD at 0 mV and  
654 +40 mV, and to -40 mV for frames extracted from aMD at -40 mV. Conductance was esti-  
655 mated by summing up K<sup>+</sup> and Cl<sup>-</sup> currents and dividing by the applied voltage. Anion/cation  
656 ratio was computed as the ratio of the Cl<sup>-</sup> flux to the K<sup>+</sup> flux.

#### 657 **4.10 Data and scripts**

658 All our data, including aMD, GCMC/BD and MD trajectories, as well as all our scripts are  
659 available from the Dryad Digital Repository at <https://doi.org/10.5061/dryad.zw3r2286m>.

#### 660 **Supporting information**

661 **S1 Fig. Convergence of standard MD simulations of the VDAC1 N-terminal peptide.** The  
662 figure shows the number of clusters generated as a function of the simulation time in the case

663 of the ff14SB force field (A) and of the ff14IDPSFF force field (B). Clustering analysis was  
664 performed using a hierarchical agglomerative approach with an RMSD threshold of 3 Å.

665 **S2 Fig. PMF profile generated from standard MD simulations of the VDAC1 N-terminal**  
666 **peptide.** PMFs were obtained in the cases of ff14SB (top) and ff14IDPSFF (bottom) and are  
667 given as a function of the radius of gyration ( $R_g$ ) and the RMSD with respect to the N-terminal  
668 peptide conformation in the 3EMN crystal structure. Representative structures in main basins  
669 and transition regions are also depicted. The top figure was built out of a 1.6  $\mu$ s-long trajectory  
670 while data at the bottom were collected over 2.1  $\mu$ s.

671 **S3 Fig. PMF profile generated from aMD simulation of the VDAC1 N-terminal peptide**  
672 **with the ff14SB force field.** Due the biased nature of the simulation, density values were re-  
673 weighted from a Maclaurin series up using terms up to rank  $k = 10$  (Eq. (5)). As in S2 Fig, the  
674 PMF is given as a function of the radius of gyration ( $R_g$ ) and the RMSD with respect to the N-  
675 terminal peptide conformation in the crystal structure of mVDAC1. The dashed dark-blue  
676 trajectory represents a 20-ns-long aMD trajectory generated by initiating our simulation from  
677 a fully unfolded structure (dark blue cross) that clearly shows the convergence to the helix-  
678 enriched basin.

679 **S4 Fig. Secondary structure content of wild-type mVDAC1 N-terminus.** Values were ob-  
680 tained from 100-ns-long MD runs using the ff14SB force field (left) and the ff14IDPSFF force  
681 field (right). Note that  $\beta$ -content is not displayed as it is everywhere zero and helical content  
682 includes both  $3_{10}$ -helical and regular  $\alpha$ -helical content. For both force fields,  $3_{10}$ -helical content  
683 is found only in the short helix made of residues Y7 to D9 and regular helix content was only  
684 observed in the long helix made of residues K12 to T19.

685 **S5 Fig. Representative conformers of mVDAC1-Cys at 0mV, +40mV and -40 mV.** Con-  
686 formers were obtained from agglomerative hierarchical clustering analysis of aMD trajectories

687 using the RMSD of the N-terminus as a metric and a threshold distance of 3.0 Å. The repre-  
688 sentative structure (viewed from the IMS) of the 5 most populated clusters is shown at each  
689 voltage. Disulfide bridge linked L10C and A170C residues are shown in green.

690 **S6 Fig. Conductance and anion/cation ratio of mVDAC1-Cys structures generated from**  
691 **aMD at 0mV, +40 mV and -40mV.** All values were obtained from GCMC/BD runs at 150-  
692 mM KCl concentration performed on 500 representative structures of each aMD trajectory.  
693 Time series curves were reconstructed by assigning the same conductance and anion/cation  
694 ratio to all the frames of a given cluster. Red stars correspond to all the frames with a conduct-  
695 ance less than 0.6 nS or an anion/cation ratio less than 4. Note that the frames extracted from  
696 our aMD trajectories at +40mV and -40mV were selected from 140 ns and 300 ns, respectively.

697 **S7 Fig. Subconducting mVDAC1-Cys structures identified from standard MD.** The  
698 frames (IMS view) correspond to the rows highlighted in green in S3 Table, namely frames 4,  
699 12, 30, 37 and 46. The first cluster (S1 state) is made of frames 30 and 46 while the second  
700 cluster is made of frames 4, 12 and 37 (S2 state).

701 **S8 Fig. RMSD in mVDAC1-Cys open state and subconducting S1 state.** The backbone  
702 RMSD of the whole channel as well as the RMSD of the T6-G25 segment are shown.

703 **S9 Fig. Application of the sequence-based protein secondary structure prediction s2D**  
704 **method on the VDAC1 N-terminus.** The graph displays random-coil and secondary structure  
705 propensity for each residue.

706 **S10 Fig. Hydrogen bonds and hydrophobic contacts in mVDAC1-Cys open and S1 states.**  
707 Each graph was built out of 25 frames equally spaced in time in each 450-ns-long trajectory.  
708 Only contacts occurring in 50% of cases or more are depicted. Red squares correspond to hy-  
709 drogen bonds while blue squares stand for hydrophobic contacts. Note that contacts are only  
710 displayed in the upper left corner of each graph to avoid redundancy. In S1 state, the dashed



711 rectangle includes hydrophobic contacts that stabilize the N-terminus against the barrel wall.

712 Other interactions such as the E84-K115 salt bridge are shown.

713 **S1 Table. Root-mean-square error (RMSE) and Pearson correlation coefficient (R) ob-**  
714 **tained by comparing experimental and simulated chemical shifts of the VDAC1 N-termi-**  
715 **nal peptide.** Simulations include MD and aMD ones using either the ff14SB or the  
716 ff14IDPSFF force field.

717 **S2 Table. Molecular simulations of mVDAC1 (WT and double Cys mutant) performed**  
718 **in the present study.**

719 **S3 Table. Current, conductance and anion/cation ratio of mVDAC1-cys frames selected**  
720 **from aMD at +40mV.** The values were predicted by running 200-ns-long standard MD for  
721 each frame and by recording ion permeation events. The  $R^2$  coefficient obtained from linear  
722 regression of the *crossing-events-vs-time* curve is also displayed. The current was computed  
723 by multiplying the predicted slope of the curve by a scaling factor (section 4.8). Rows high-  
724 lighted in green correspond to frames displaying both reduced conductance (around 0.6 nS or  
725 less) and a low anion/cation ratio (around 4 or less). Frames 30 and 46 correspond to the same  
726 structural S1 state while frames 4, 12 and 37 belong to S2 state (S7 Fig). Rows highlighted in  
727 orange stand for frames showing only low anion/cation ratio while rows in grey-blue are related  
728 to subconducting states with high anion/cation ratio (greater than 4.5).

729 **S1 Video. Clip of the MD trajectory of wild-type mVDAC1 (650 ns) using ff14IDPSFF in**  
730 **the absence of applied voltage.** The channel is viewed from the expected cytoplasmic side of  
731 the membrane. No conformational transition or change in secondary structure content was ob-  
732 served.

733 **S2 Video. aMD trajectory of mVDAC1-Cys (420 ns) at +40mV using ff14SB.** The channel  
734 is viewed from the cytoplasm. Disulfide bridge linked L10C and A170C residues are shown in  
735 green. No conformational transition or change in secondary structure content was observed.

736 **S3 Video. aMD trajectory of mVDAC1-Cys (540 ns) at 0mV using ff14IDPSFF.** The chan-  
737 nel is viewed from the cytoplasm. Disulfide bridge linked L10C and A170C residues are shown  
738 in green. The  $3_{10}$ -helix (in dark blue) made of residues Y7, A8 and D9 was found to unfold at  
739 160 ns. However, the position of the N-terminal tail (M1-P5) and of the long helix (K12 to  
740 T19) remained unchanged.

741 **S4 Video. aMD trajectory of mVDAC1-Cys (320 ns) at +40mV using ff14IDPSFF.** The  
742 channel is viewed from the cytoplasm. Disulfide bridge linked L10C and A170C residues are  
743 shown in green. The  $3_{10}$ -helix (in dark blue) made of residues Y7, A8 and D9 was found to  
744 unfold at 20 ns. Subsequently, the N-terminal tail (M1-P5) moves further inside the barrel (at  
745 140 ns) leading to steric hindrance of the pore.

746 **S5 Video. aMD trajectory of mVDAC1-Cys (595 ns) at -40mV using ff14IDPSFF.** The  
747 channel is viewed from the cytoplasm. Disulfide bridge linked L10C and A170C residues are  
748 shown in green. The  $3_{10}$ -helix (in dark blue) made of residues Y7, A8 and D9 was found to  
749 unfold at 2 ns.

750 **S6 Video. MD trajectory of mVDAC1-Cys in the open state (450 ns) at +40mV using the**  
751 **ff14IDPSFF force field.** The channel is viewed from the cytoplasm. Disulfide bridge linked  
752 L10C and A170C residues are shown in green.

753 **S7 Video. MD trajectory of mVDAC1-Cys in the S1 state (450 ns) at +40mV using the**  
754 **ff14IDPSFF force field.** The channel is viewed from the cytoplasm. Disulfide bridge linked  
755 L10C and A170C residues are shown in green.

756

757 **Author Contributions**

758 Conceptualization: Jordane Preto, Isabelle Krimm

759 Formal analysis: Jordane Preto

760 Investigation: Jordane Preto

761 Methodology: Jordane Preto

762 Resources: Isabelle Krimm

763 Software: Jordane Preto

764 Supervision: Isabelle Krimm

765 Visualization: Jordane Preto

766 Writing – original draft: Jordane Preto, Isabelle Krimm

767 Writing – review & editing: Jordane Preto, Isabelle Krimm

768

769 **Acknowledgments.** We gratefully acknowledge support from the PSMN (Pôle Scientifique de  
770 Modélisation Numérique) of the ENS de Lyon for computing resources. We also would like to  
771 acknowledge the Ligue contre le cancer – Comité de Haute-Savoie – for additional financial  
772 support.

773

774 **Competing interests.** The authors have declared that no competing interests exist.

775

776 **References**

777 (1) Shoshan-Barmatz V, De Pinto V, Zweckstetter M, Raviv Z, Keinan N, Arbel N. VDAC, a  
778 multi-functional mitochondrial protein regulating cell life and death. Mol Aspects Med 2010  
779 June 01;31(3):227-285.

- 780 (2) Shoshan-Barmatz V, Maldonado EN, Krelin Y. VDAC1 at the crossroads of cell  
781 metabolism, apoptosis and cell stress. *Cell Stress* 2017 October 01;1(1):11-36.
- 782 (3) Magri A, Reina S, De Pinto V. VDAC1 as Pharmacological Target in Cancer and  
783 Neurodegeneration: Focus on Its Role in Apoptosis. *Front Chem* 2018 April 06;6:108.
- 784 (4) Bergdoll L, Grabe M, Abramson J. An Assessment of How VDAC Structures Have  
785 Impacted Our Understanding of Their Function. *Molecular Basis for Mitochondrial Signaling*:  
786 Springer; 2017. p. 141-160.
- 787 (5) Colombini M. VDAC structure, selectivity, and dynamics. *Biochim Biophys Acta* 2012  
788 June 01;1818(6):1457-1465.
- 789 (6) Hodge T, Colombini M. Regulation of metabolite flux through voltage-gating of VDAC  
790 channels. *J Membr Biol* 1997 June 01;157(3):271-279.
- 791 (7) Bayrhuber M, Meins T, Habeck M, Becker S, Giller K, Villinger S, et al. Structure of the  
792 human voltage-dependent anion channel. *Proc Natl Acad Sci U S A* 2008 October  
793 07;105(40):15370-15375.
- 794 (8) Hiller S, Garces RG, Malia TJ, Orekhov VY, Colombini M, Wagner G. Solution structure  
795 of the integral human membrane protein VDAC-1 in detergent micelles. *Science* 2008 August  
796 29;321(5893):1206-1210.
- 797 (9) Ujwal R, Cascio D, Colletier JP, Faham S, Zhang J, Toro L, et al. The crystal structure of  
798 mouse VDAC1 at 2.3 Å resolution reveals mechanistic insights into metabolite gating. *Proc*  
799 *Natl Acad Sci U S A* 2008 November 18;105(46):17742-17747.

- 800 (10) Schneider R, Etkorn M, Giller K, Daebel V, Einfeld J, Zweckstetter M, et al. The native  
801 conformation of the human VDAC1 N terminus. *Angew Chem Int Ed Engl* 2010 March  
802 01;49(10):1882-1885.
- 803 (11) Zachariae U, Schneider R, Briones R, Gattin Z, Demers JP, Giller K, et al. beta-Barrel  
804 mobility underlies closure of the voltage-dependent anion channel. *Structure* 2012 September  
805 05;20(9):1540-1549.
- 806 (12) Geula S, Naveed H, Liang J, Shoshan-Barmatz V. Structure-based analysis of VDAC1  
807 protein: defining oligomer contact sites. *J Biol Chem* 2012 January 13;287(3):2179-2190.
- 808 (13) Mertins B, Psakis G, Grosse W, Back KC, Salisowski A, Reiss P, et al. Flexibility of the  
809 N-terminal mVDAC1 segment controls the channel's gating behavior. *PLoS One*  
810 2012;7(10):e47938.
- 811 (14) Tejjido O, Ujwal R, Hillerdal CO, Kullman L, Rostovtseva TK, Abramson J. Affixing N-  
812 terminal alpha-helix to the wall of the voltage-dependent anion channel does not prevent its  
813 voltage gating. *J Biol Chem* 2012 March 30;287(14):11437-11445.
- 814 (15) De Pinto V, Tomasello F, Messina A, Guarino F, Benz R, La Mendola D, et al.  
815 Determination of the conformation of the human VDAC1 N-terminal peptide, a protein moiety  
816 essential for the functional properties of the pore. *Chembiochem* 2007 May 07;8(7):744-756.
- 817 (16) Guardiani C, Scorciapino MA, Amodeo GF, Grdadolnik J, Pappalardo G, De Pinto V, et  
818 al. The N-Terminal Peptides of the Three Human Isoforms of the Mitochondrial Voltage-  
819 Dependent Anion Channel Have Different Helical Propensities. *Biochemistry* 2015 September  
820 15;54(36):5646-5656.

- 821 (17) Maier JA, Martinez C, Kasavajhala K, Wickstrom L, Hauser KE, Simmerling C. ff14SB:  
822 Improving the Accuracy of Protein Side Chain and Backbone Parameters from ff99SB. *J Chem*  
823 *Theory Comput* 2015 August 11;11(8):3696-3713.
- 824 (18) Song D, Luo R, Chen H. The IDP-Specific Force Field ff14IDPSFF Improves the  
825 Conformer Sampling of Intrinsically Disordered Proteins. *Journal of Chemical Information and*  
826 *Modeling* 2017.
- 827 (19) Preto J, Clementi C. Fast recovery of free energy landscapes via diffusion-map-directed  
828 molecular dynamics. *Phys Chem Chem Phys* 2014 Sep 28;16(36):19181-19191.
- 829 (20) Shen Y, Bax A. SPARTA+: a modest improvement in empirical NMR chemical shift  
830 prediction by means of an artificial neural network. *J Biomol NMR* 2010 September  
831 01;48(1):13-22.
- 832 (21) Hamelberg D, Mongan J, McCammon JA. Accelerated molecular dynamics: a promising  
833 and efficient simulation method for biomolecules. *J Chem Phys* 2004 June 22;120(24):11919-  
834 11929.
- 835 (22) Pierce LC, Salomon-Ferrer R, Augusto F. de Oliveira, Cesar, McCammon JA, Walker  
836 RC. Routine access to millisecond time scale events with accelerated molecular dynamics.  
837 *Journal of chemical theory and computation* 2012;8(9):2997-3002.
- 838 (23) Tian C, Kasavajhala K, Belfon KAA, Raguette L, Huang H, Migués AN, et al. ff19SB:  
839 Amino-Acid-Specific Protein Backbone Parameters Trained against Quantum Mechanics  
840 Energy Surfaces in Solution. *J Chem Theory Comput* 2020 January 14;16(1):528-552.

- 841 (24) Villinger S, Briones R, Giller K, Zachariae U, Lange A, de Groot BL, et al. Functional  
842 dynamics in the voltage-dependent anion channel. *Proc Natl Acad Sci U S A* 2010 December  
843 28;107(52):22546-22551.
- 844 (25) Rostovtseva TK, Bezrukov SM. VDAC inhibition by tubulin and its physiological  
845 implications. *Biochim Biophys Acta* 2012 June 01;1818(6):1526-1535.
- 846 (26) Noskov SY, Rostovtseva TK, Chamberlin AC, Tejjido O, Jiang W, Bezrukov SM. Current  
847 state of theoretical and experimental studies of the voltage-dependent anion channel (VDAC).  
848 *Biochim Biophys Acta* 2016 July 01;1858(7 Pt B):1778-1790.
- 849 (27) Im W, Seefeld S, Roux B. A Grand Canonical Monte Carlo-Brownian dynamics algorithm  
850 for simulating ion channels. *Biophys J* 2000 August 01;79(2):788-801.
- 851 (28) Im W, Roux B. Ion permeation and selectivity of OmpF porin: a theoretical study based  
852 on molecular dynamics, Brownian dynamics, and continuum electrodiffusion theory. *J Mol*  
853 *Biol* 2002 September 27;322(4):851-869.
- 854 (29) Rui H, Lee KI, Pastor RW, Im W. Molecular dynamics studies of ion permeation in  
855 VDAC. *Biophys J* 2011 February 02;100(3):602-610.
- 856 (30) Amodeo GF, Scorciapino MA, Messina A, De Pinto V, Ceccarelli M. Charged residues  
857 distribution modulates selectivity of the open state of human isoforms of the voltage dependent  
858 anion-selective channel. *PLoS One* 2014 August 01;9(8):e103879.
- 859 (31) Romero P, Obradovic Z, Li X, Garner EC, Brown CJ, Dunker AK. Sequence complexity  
860 of disordered protein. *Proteins* 2001 January 01;42(1):38-48.

- 861 (32) Sormanni P, Camilloni C, Fariselli P, Vendruscolo M. The s2D method: simultaneous  
862 sequence-based prediction of the statistical populations of ordered and disordered regions in  
863 proteins. *J Mol Biol* 2015 February 27;427(4):982-996.
- 864 (33) Walsh I, Martin AJ, Di Domenico T, Tosatto SC. ESpritz: accurate and fast prediction of  
865 protein disorder. *Bioinformatics* 2012 February 15;28(4):503-509.
- 866 (34) Wright PE, Dyson HJ. Linking folding and binding. *Curr Opin Struct Biol* 2009;19(1):31-  
867 38.
- 868 (35) Meszaros B, Tompa P, Simon I, Dosztanyi Z. Molecular principles of the interactions of  
869 disordered proteins. *J Mol Biol* 2007 September 14;372(2):549-561.
- 870 (36) Wang W, Ye W, Jiang C, Luo R, Chen H. New Force Field on Modeling Intrinsically  
871 Disordered Proteins. *Chemical Biology & Drug Design* 2014;84(3):253-269.
- 872 (37) Robustelli P, Piana S, Shaw DE. Developing a molecular dynamics force field for both  
873 folded and disordered protein states. *Proc Natl Acad Sci U S A* 2018 May 22;115(21):E4758-  
874 E4766.
- 875 (38) Best RB, Zheng W, Mittal J. Correction to Balanced Protein–Water Interactions Improve  
876 Properties of Disordered Proteins and Non-Specific Protein Association. *Journal of Chemical*  
877 *Theory and Computation* 2015;11(4):1978.
- 878 (39) Bohm R, Amodeo GF, Murlidaran S, Chavali S, Wagner G, Winterhalter M, et al. The  
879 Structural Basis for Low Conductance in the Membrane Protein VDAC upon beta-NADH  
880 Binding and Voltage Gating. *Structure* 2020 February 04;28(2):206-214.e4.



- 881 (40) Choudhary OP, Paz A, Adelman JL, Colletier JP, Abramson J, Grabe M. Structure-guided  
882 simulations illuminate the mechanism of ATP transport through VDAC1. *Nat Struct Mol Biol*  
883 2014 July 01;21(7):626-632.
- 884 (41) Briones R, Weichbrodt C, Paltrinieri L, Mey I, Villinger S, Giller K, et al. Voltage  
885 Dependence of Conformational Dynamics and Subconducting States of VDAC-1. *Biophys J*  
886 2016 September 20;111(6):1223-1234.
- 887 (42) Huang J, Rauscher S, Nawrocki G, Ran T, Feig M, de Groot BL, et al. CHARMM36m:  
888 an improved force field for folded and intrinsically disordered proteins. *Nat Methods* 2017  
889 January 01;14(1):71-73.
- 890 (43) Robustelli P, Piana S, Shaw DE. Developing a molecular dynamics force field for both  
891 folded and disordered protein states. *Proc Natl Acad Sci U S A* 2018 May 22;115(21):E4758-  
892 E4766.
- 893 (44) Blachly-Dyson E, Peng S, Colombini M, Forte M. Selectivity changes in site-directed  
894 mutants of the VDAC ion channel: structural implications. *Science* 1990 March  
895 09;247(4947):1233-1236.
- 896 (45) Pearlman DA, Case DA, Caldwell JW, Ross WS, Cheatham TE, DeBolt S, et al. AMBER,  
897 a package of computer programs for applying molecular mechanics, normal mode analysis,  
898 molecular dynamics and free energy calculations to simulate the structural and energetic  
899 properties of molecules. *Comput Phys Commun* 1995;91(1-3):1-41.
- 900 (46) *Molecular Operating Environment (MOE)*, 2019.01; Chemical Computing Group ULC,  
901 1010 Sherbooke St. West, Suite #910, Montreal, QC, Canada, H3A 2R7, 2020.

- 902 (47) Karplus M, McCammon JA. Molecular dynamics simulations of biomolecules. *Nat Struct*  
903 *Biol* 2002 Sep;9(9):646-652.
- 904 (48) Wang Y, Markwick PR, de Oliveira CA, McCammon JA. Enhanced Lipid Diffusion and  
905 Mixing in Accelerated Molecular Dynamics. *J Chem Theory Comput* 2011 October  
906 11;7(10):3199-3207.
- 907 (49) Miao Y, Sinko W, Pierce L, Bucher D, Walker RC, McCammon JA. Improved  
908 Reweighting of Accelerated Molecular Dynamics Simulations for Free Energy Calculation. *J*  
909 *Chem Theory Comput* 2014 July 08;10(7):2677-2689.
- 910 (50) Lomize MA, Pogozheva ID, Joo H, Mosberg HI, Lomize AL. OPM database and PPM  
911 web server: resources for positioning of proteins in membranes. *Nucleic Acids Res* 2012  
912 January 01;40(Database issue):370.
- 913 (51) Jo S, Kim T, Im W. Automated builder and database of protein/membrane complexes for  
914 molecular dynamics simulations. *PLoS One* 2007 September 12;2(9):e880.
- 915 (52) Horvath SE, Daum G. Lipids of mitochondria. *Prog Lipid Res* 2013 October 01;52(4):590-  
916 614.
- 917 (53) HARNED HS, NUTTALL RL. The diffusion coefficient of potassium chloride in dilute  
918 aqueous solution. *J Am Chem Soc* 1947 April 01;69(4):736-740.
- 919 (54) Im W, Roux B. Ion permeation and selectivity of OmpF porin: a theoretical study based  
920 on molecular dynamics, Brownian dynamics, and continuum electrodiffusion theory. *J Mol*  
921 *Biol* 2002 September 27;322(4):851-869.

922 (55) Lee KI, Jo S, Rui H, Egwolf B, Roux B, Pastor RW, et al. Web interface for Brownian  
923 dynamics simulation of ion transport and its applications to beta-barrel pores. J Comput Chem  
924 2012 January 30;33(3):331-339.

925

Cytoplasm

MOM

IMS

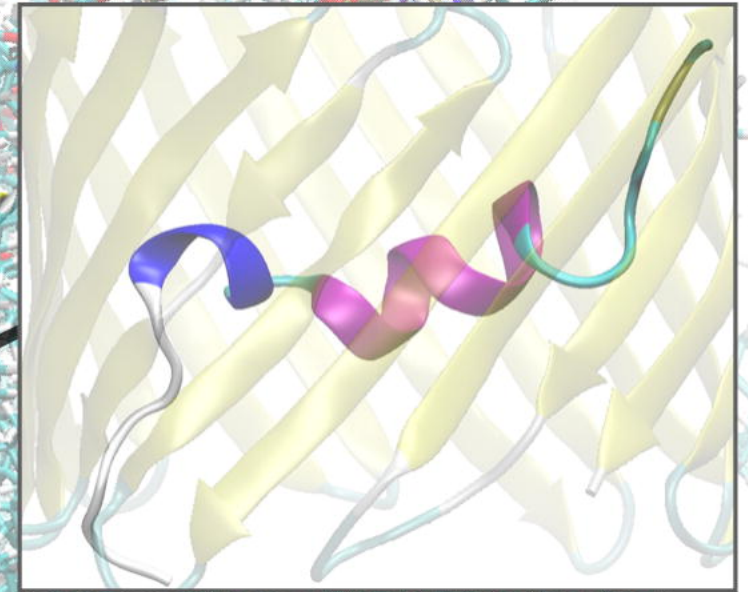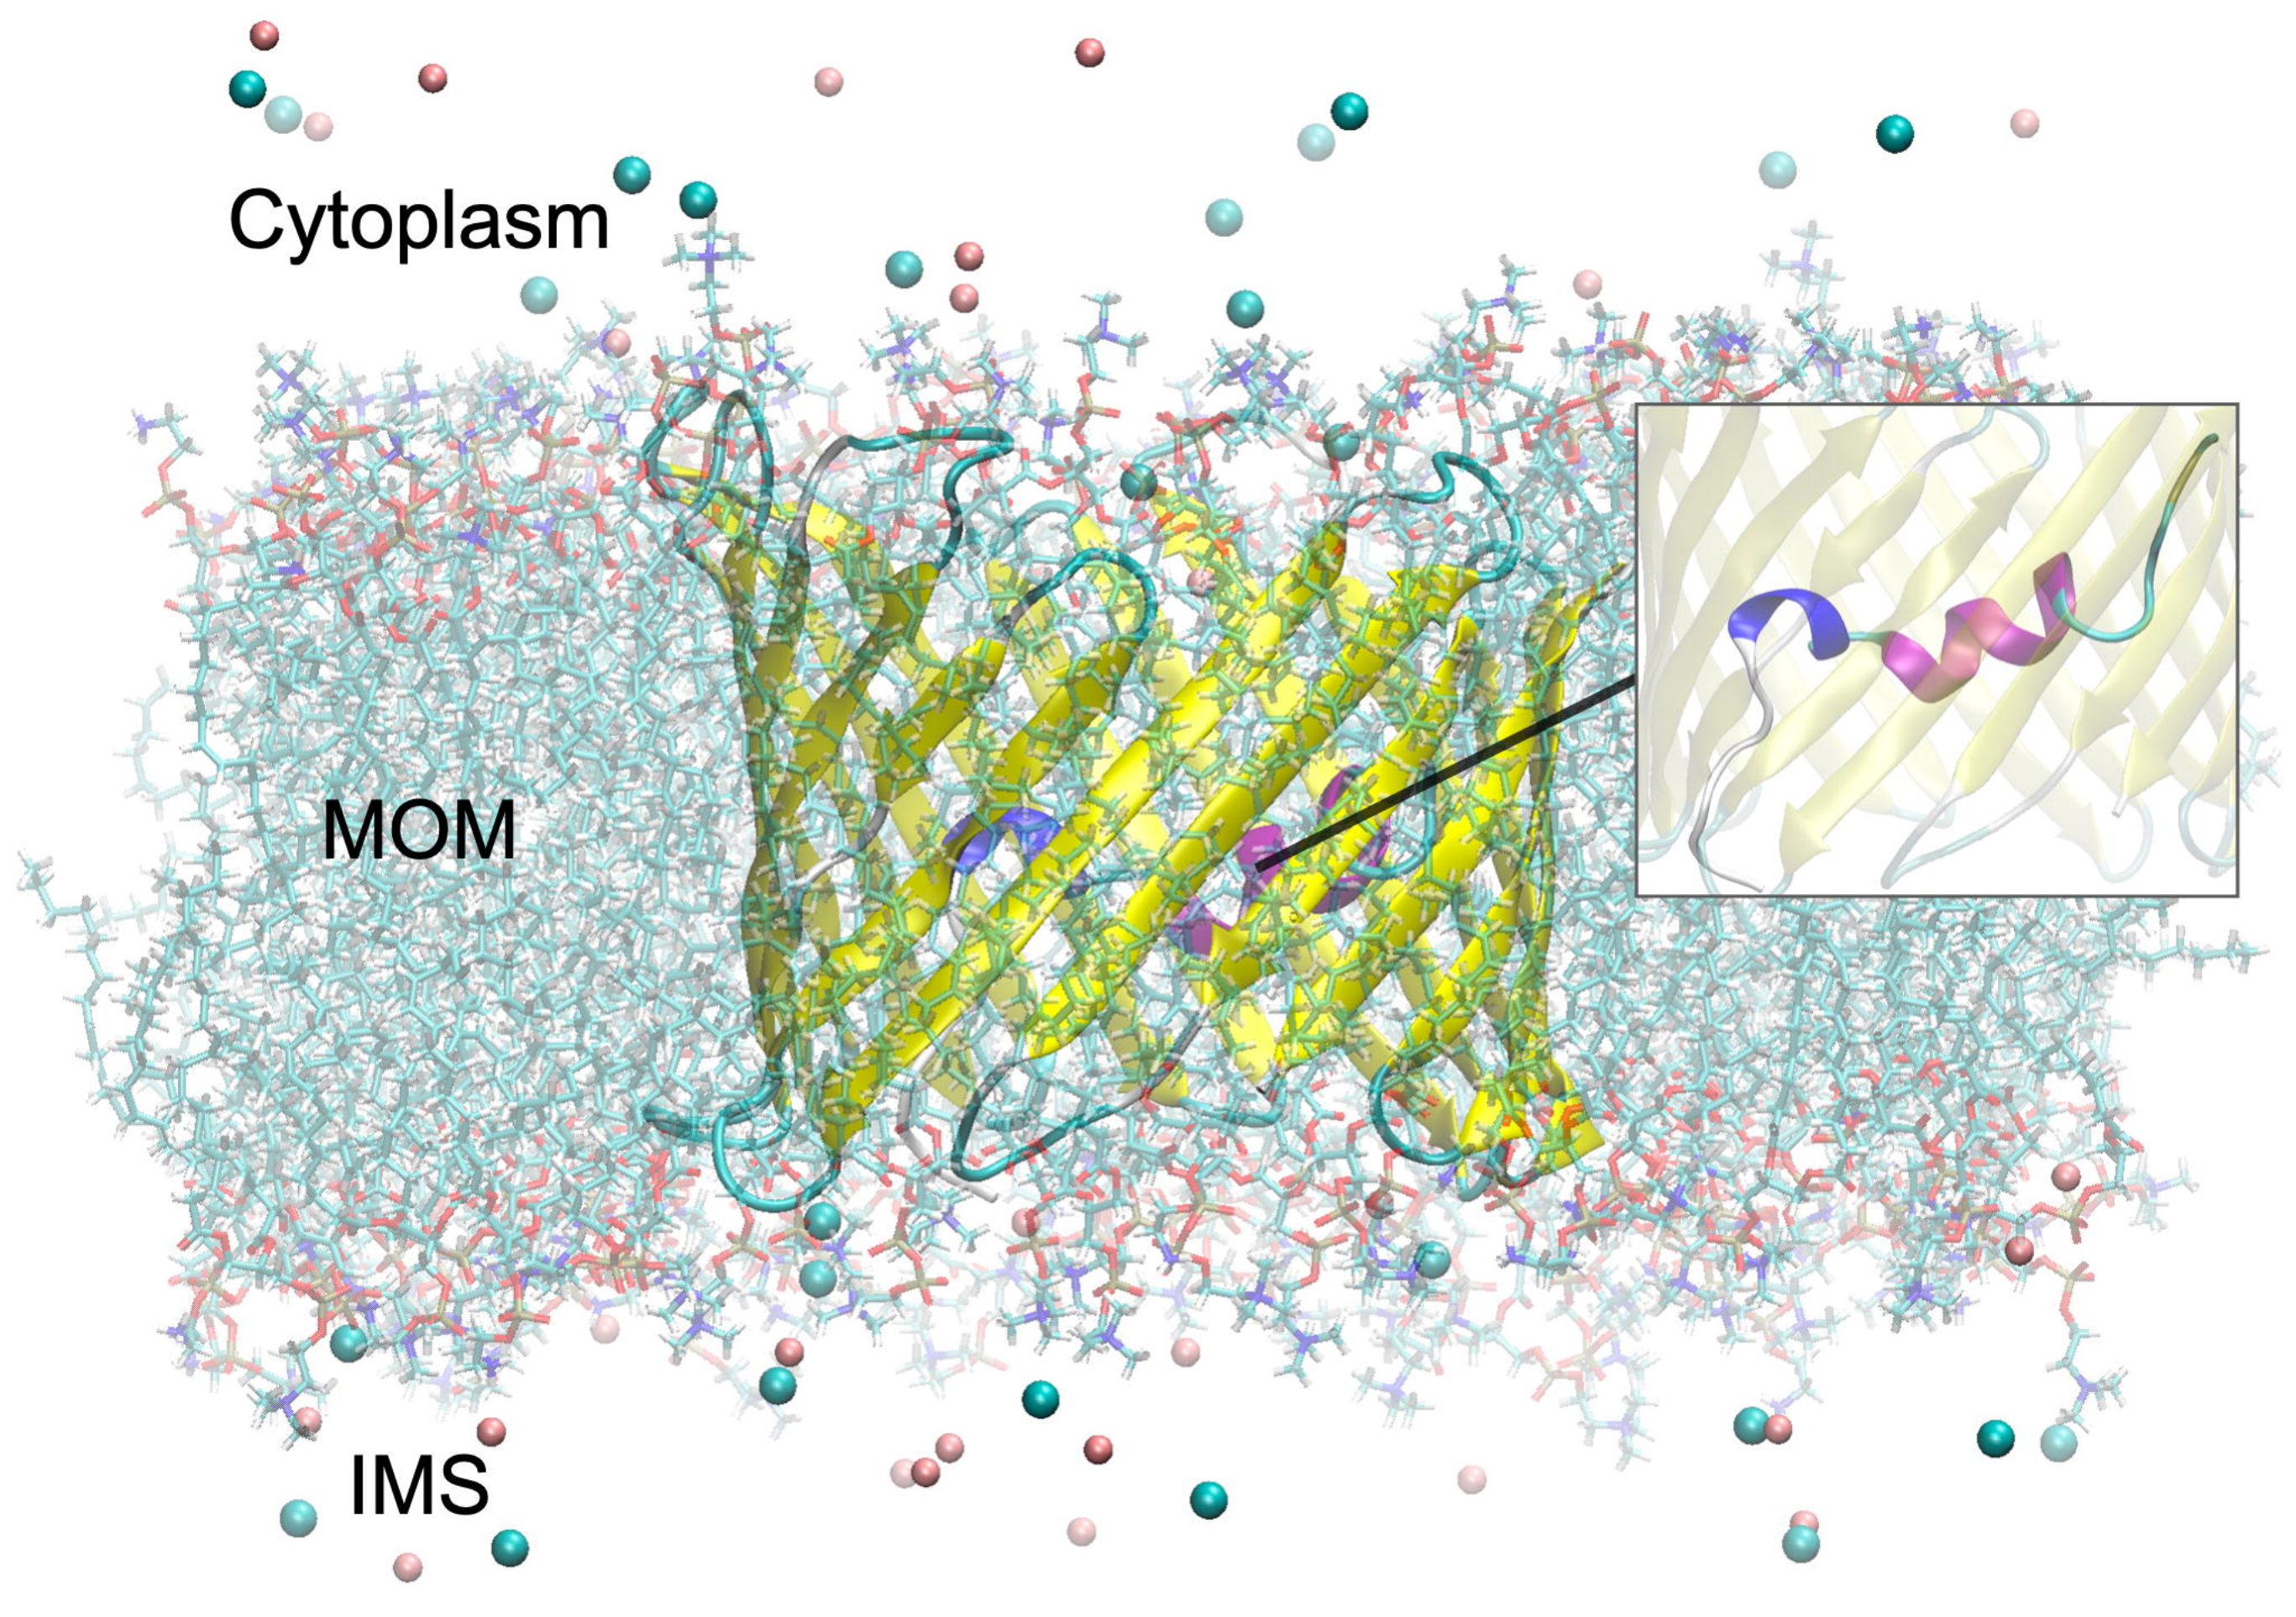

ff14SB

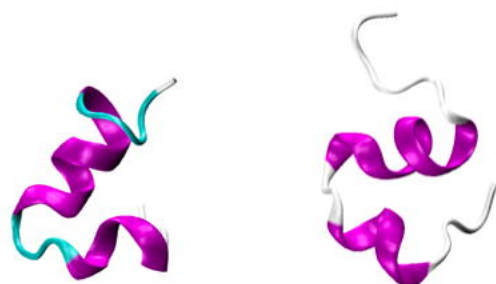

28.40%

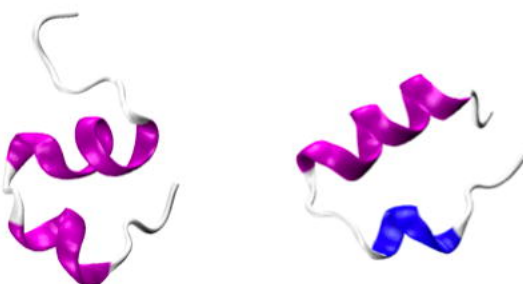

19.09%

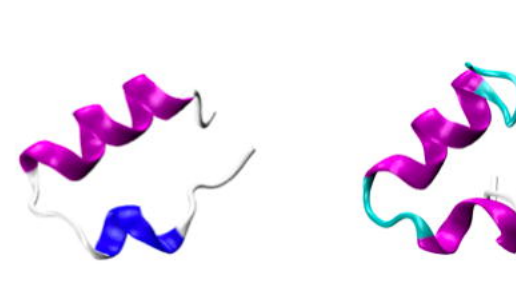

17.05%

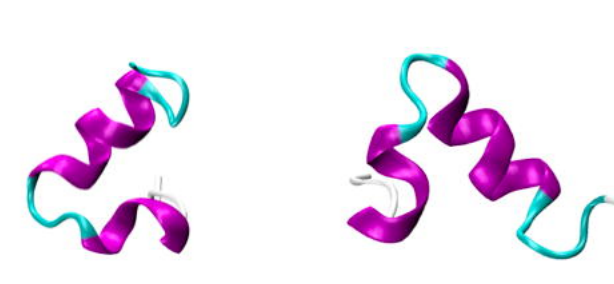

11.16%

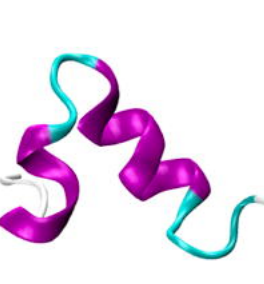

3.36%

ff14IDPSFF

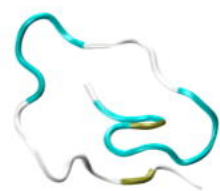

14.94%

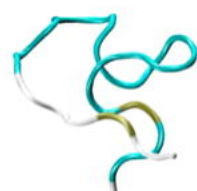

5.61%

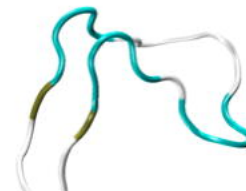

4.28%

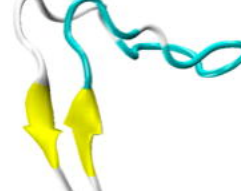

3.24%

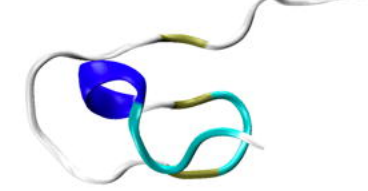

1.24% \*

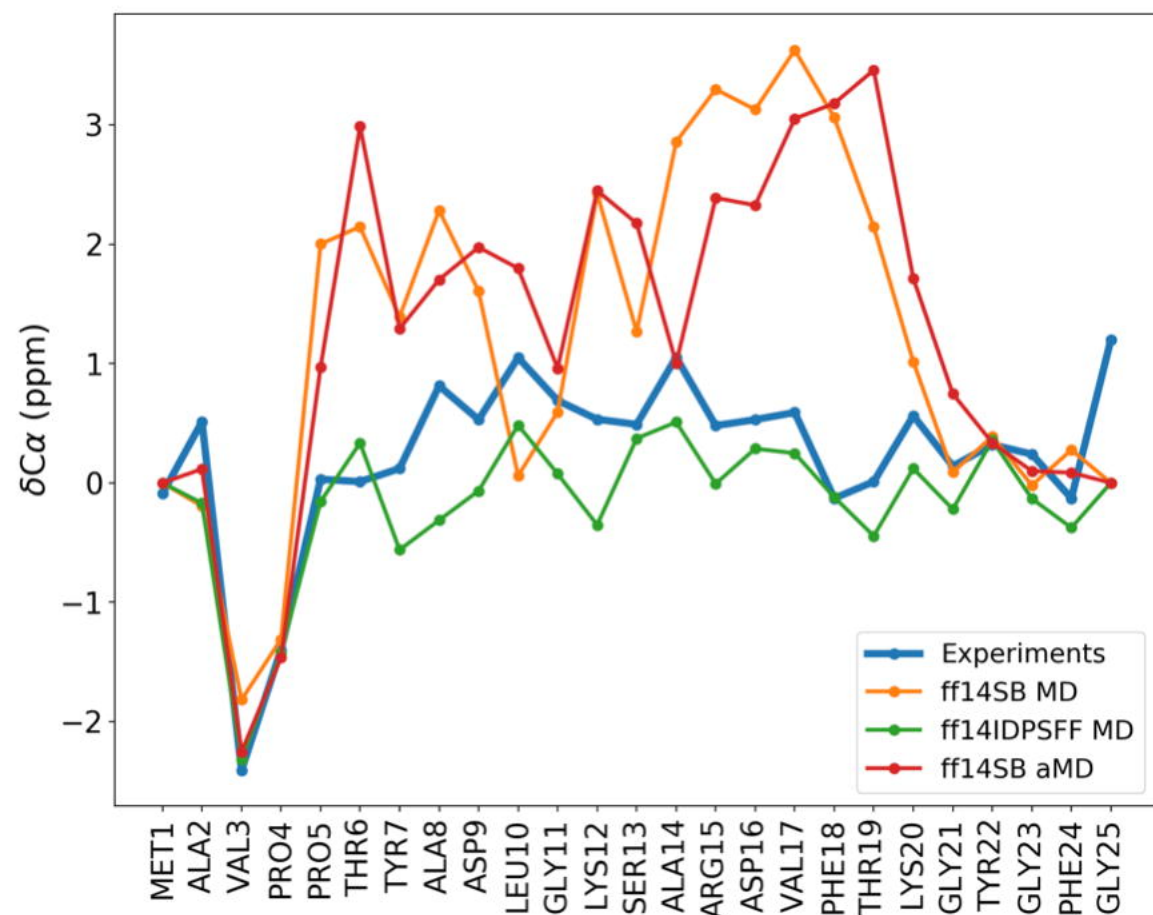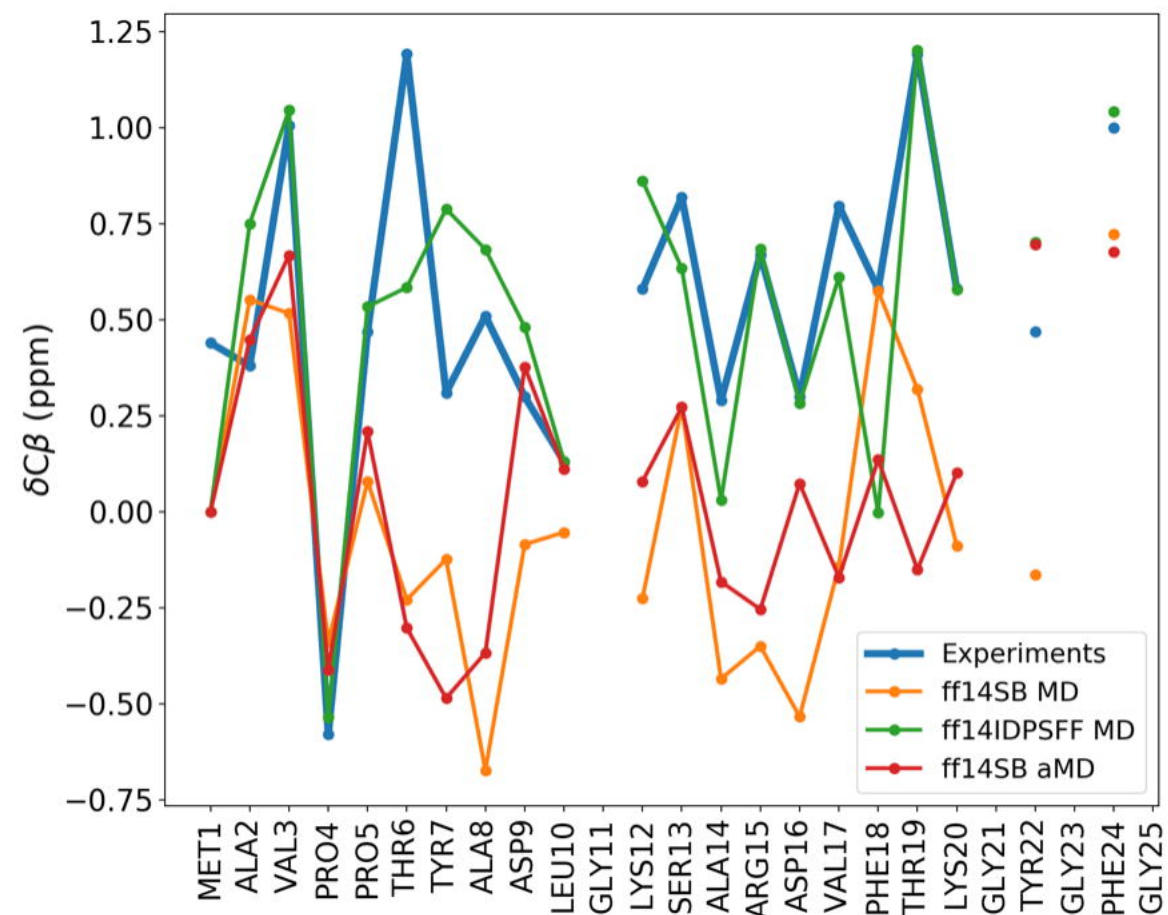

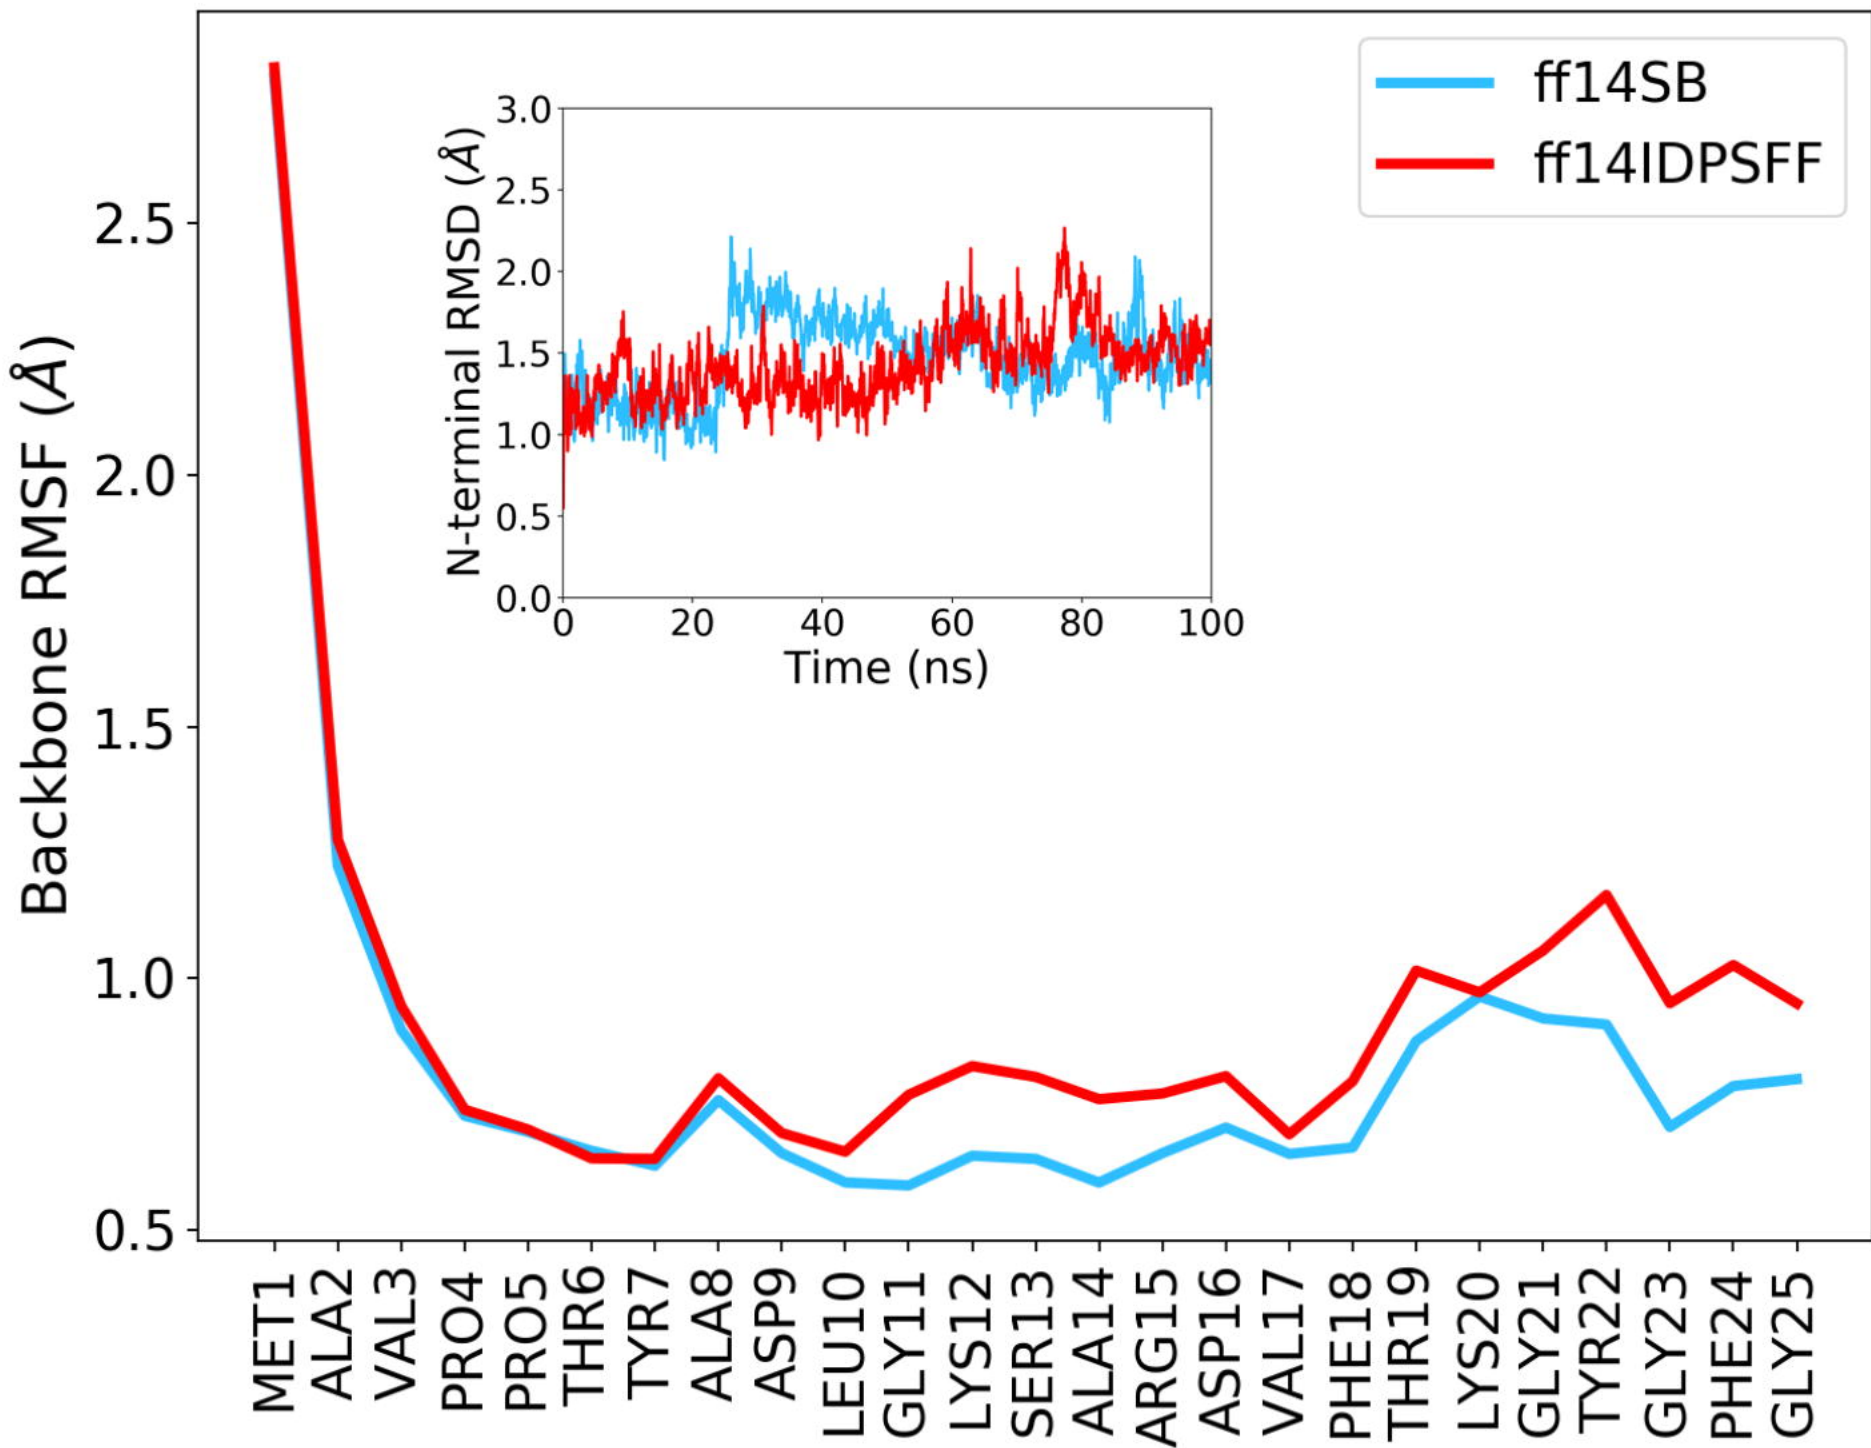

**(A)**

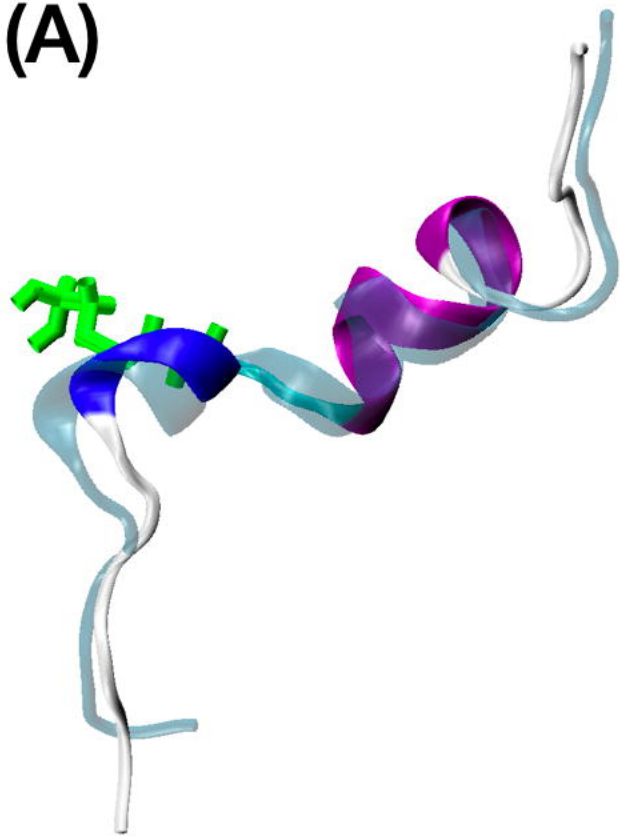

**(B)**

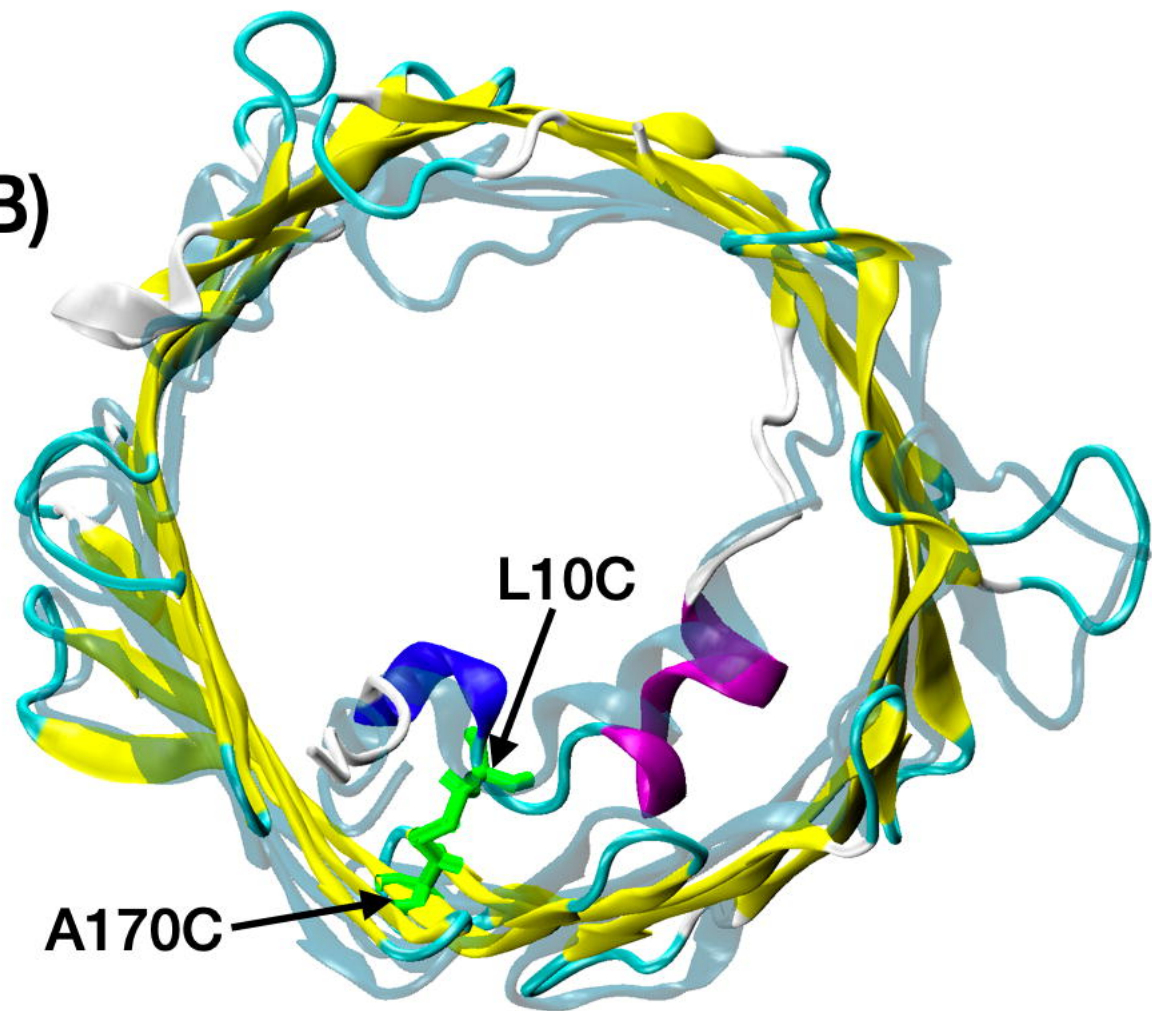

160 ns

200 ns

255 ns

285 ns

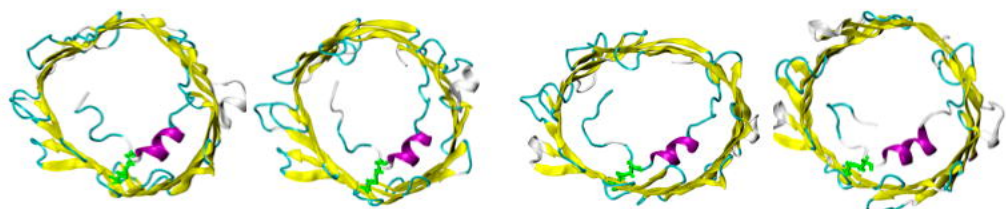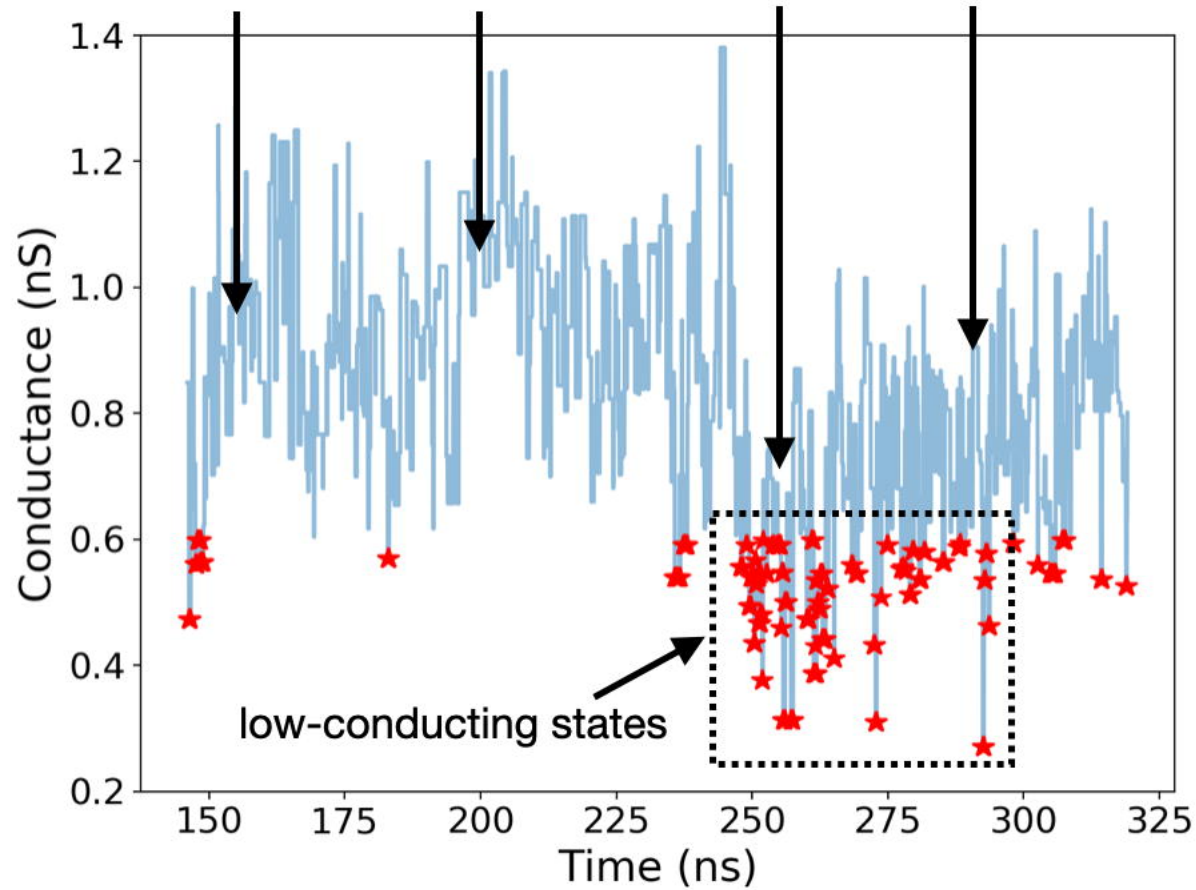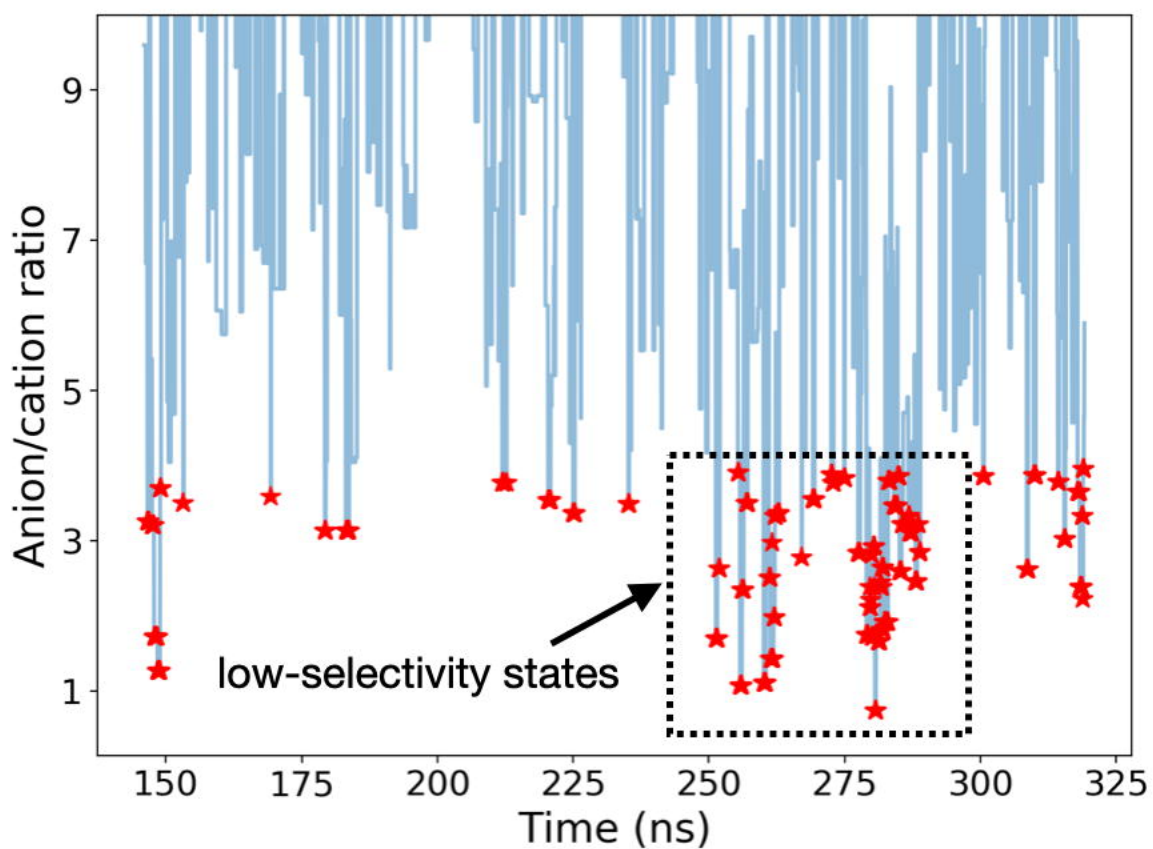



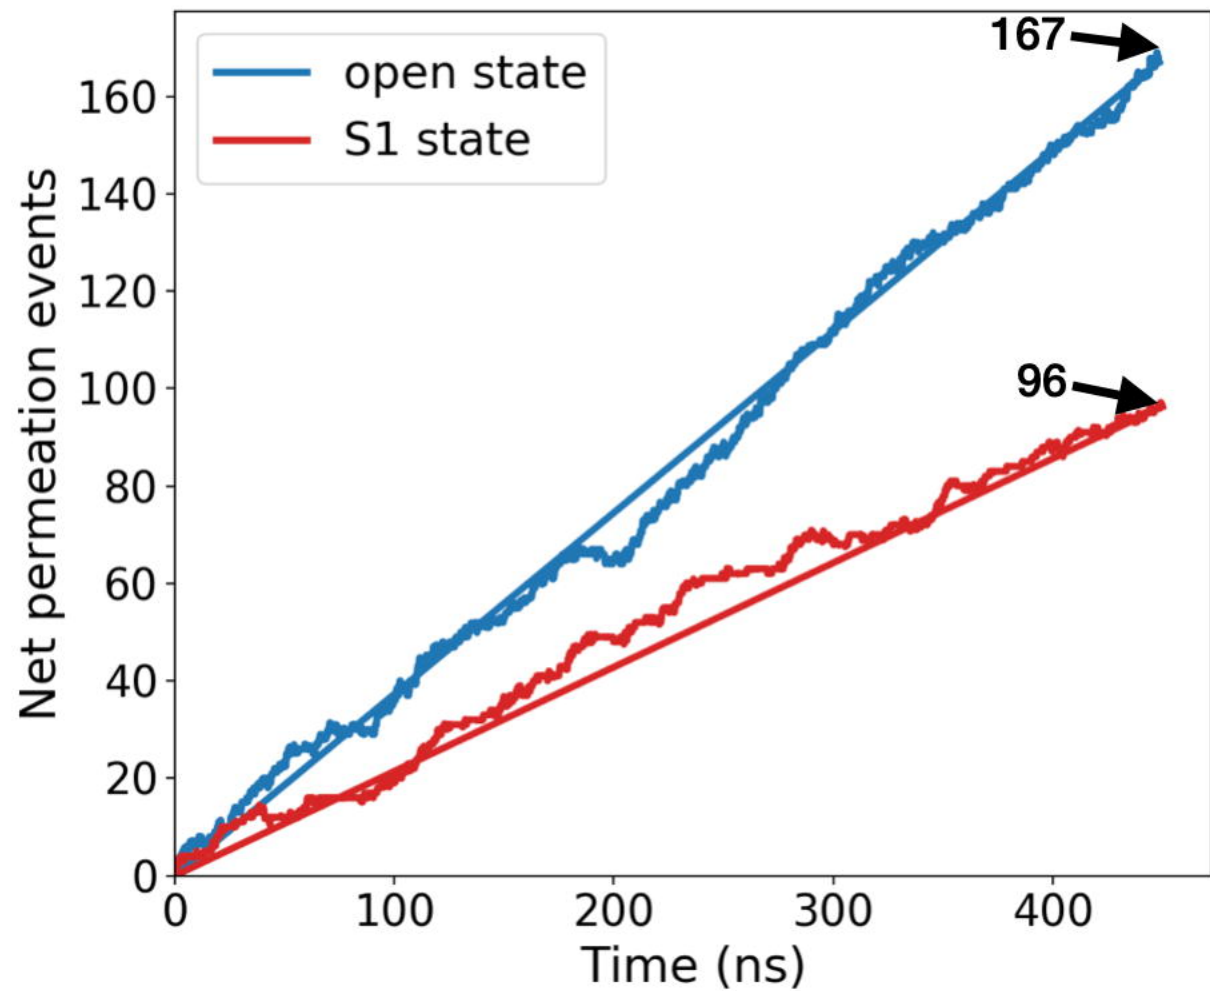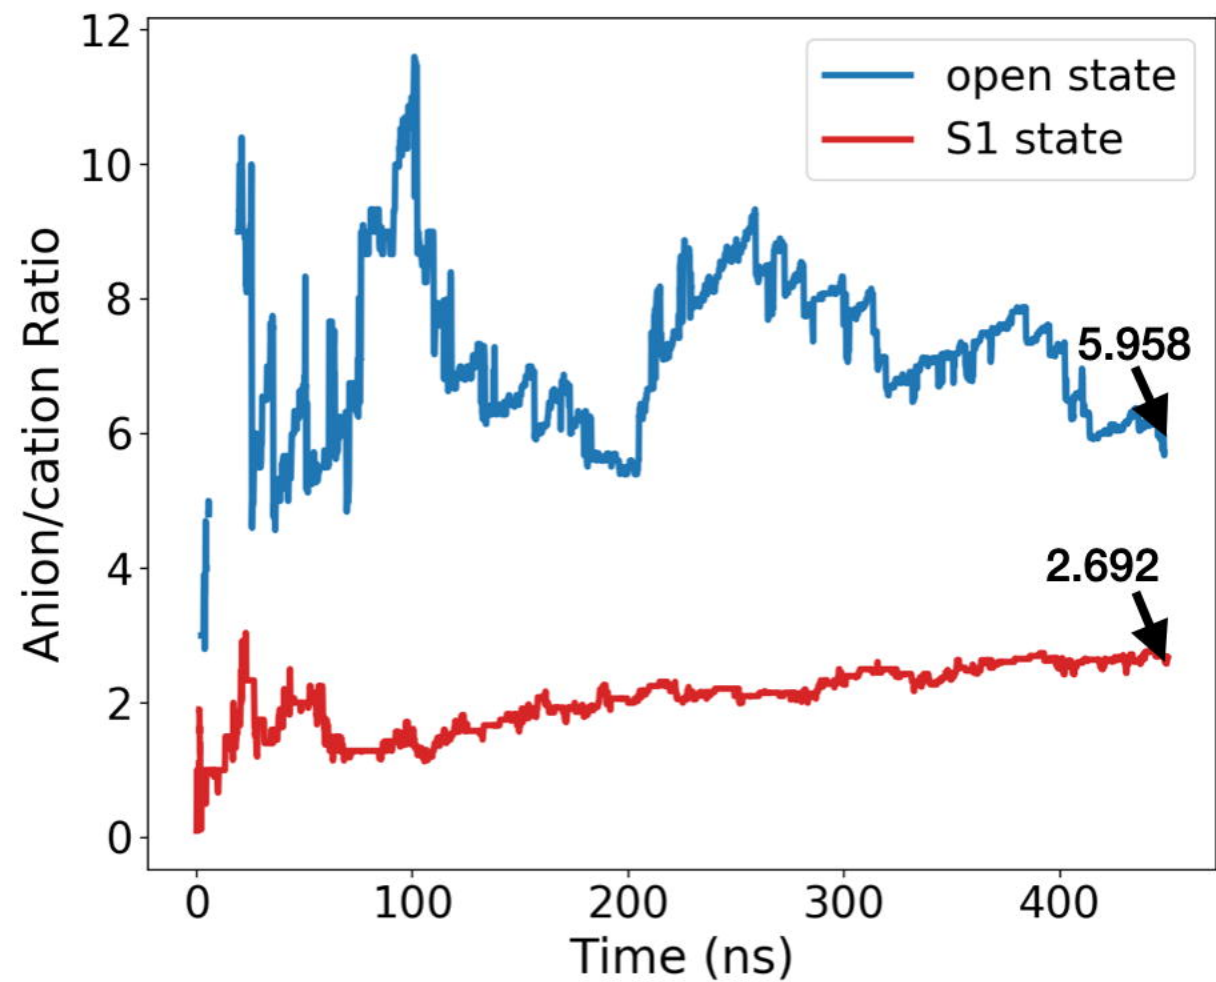

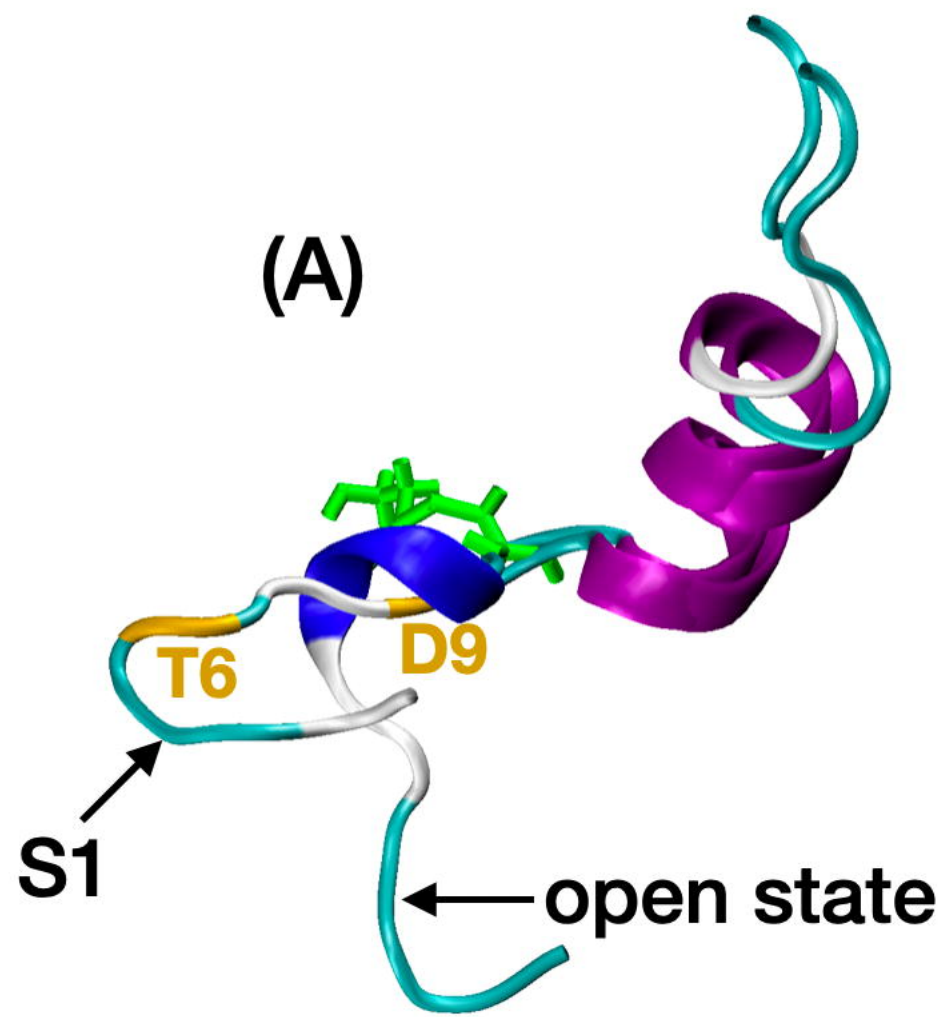

**open state**

**(B)**

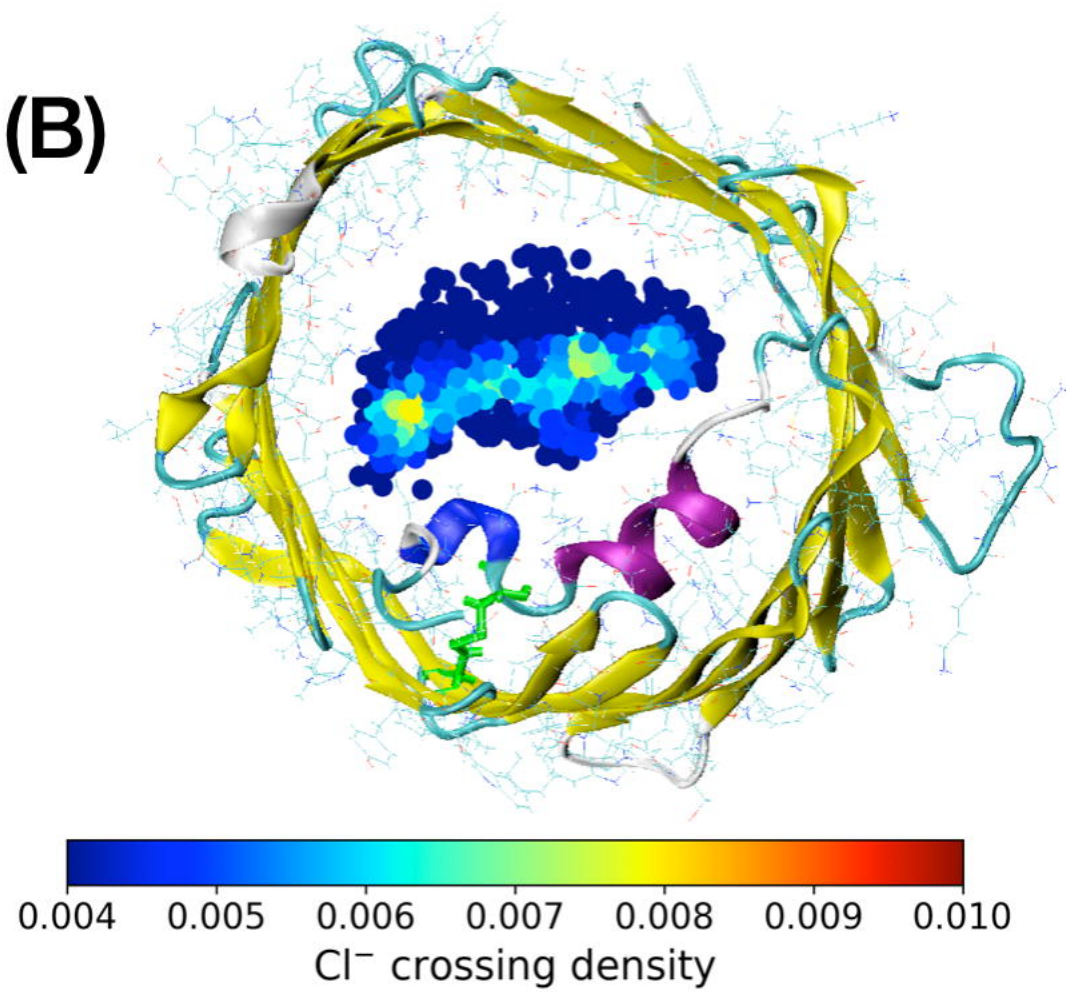

**S1 state**

**(C)**

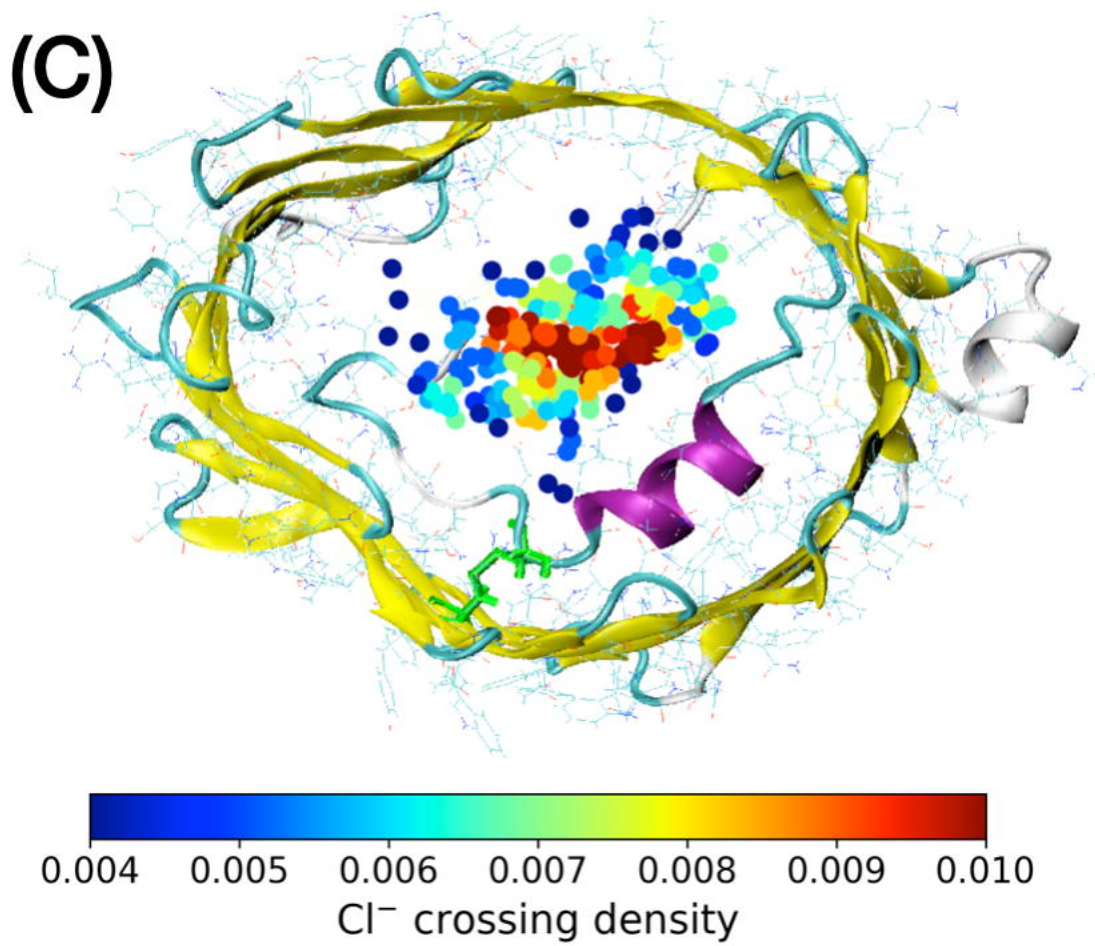

**(D)**

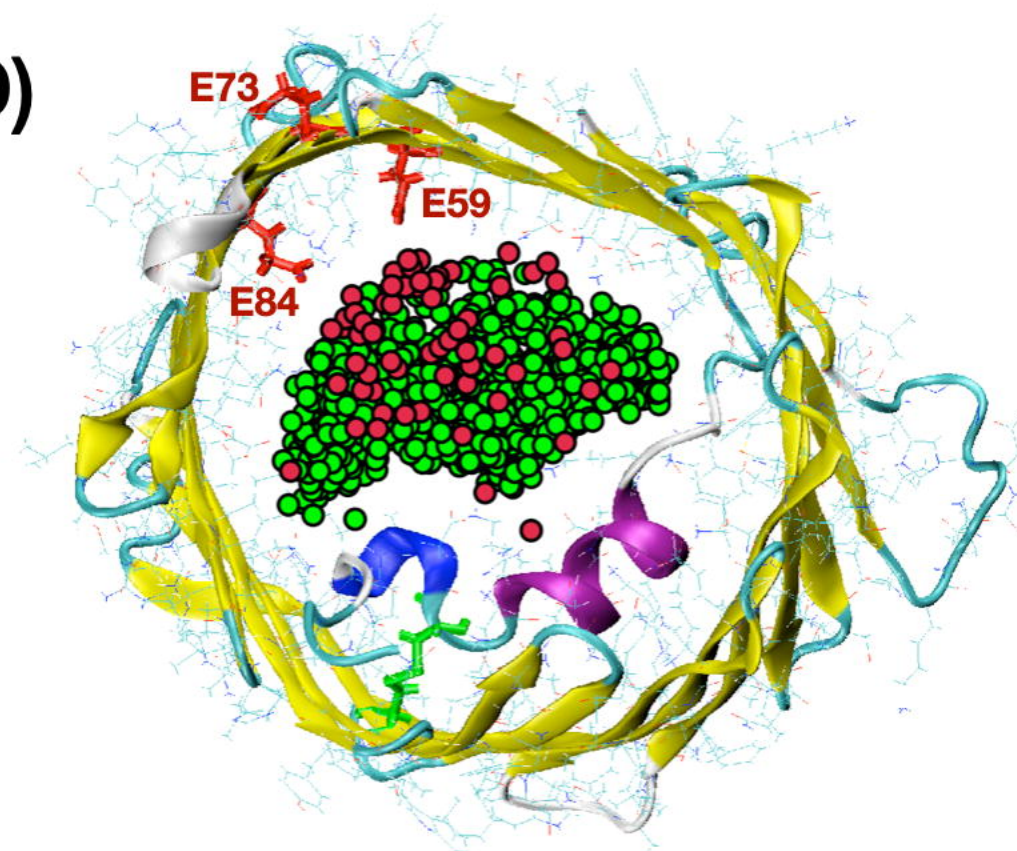

**(E)**

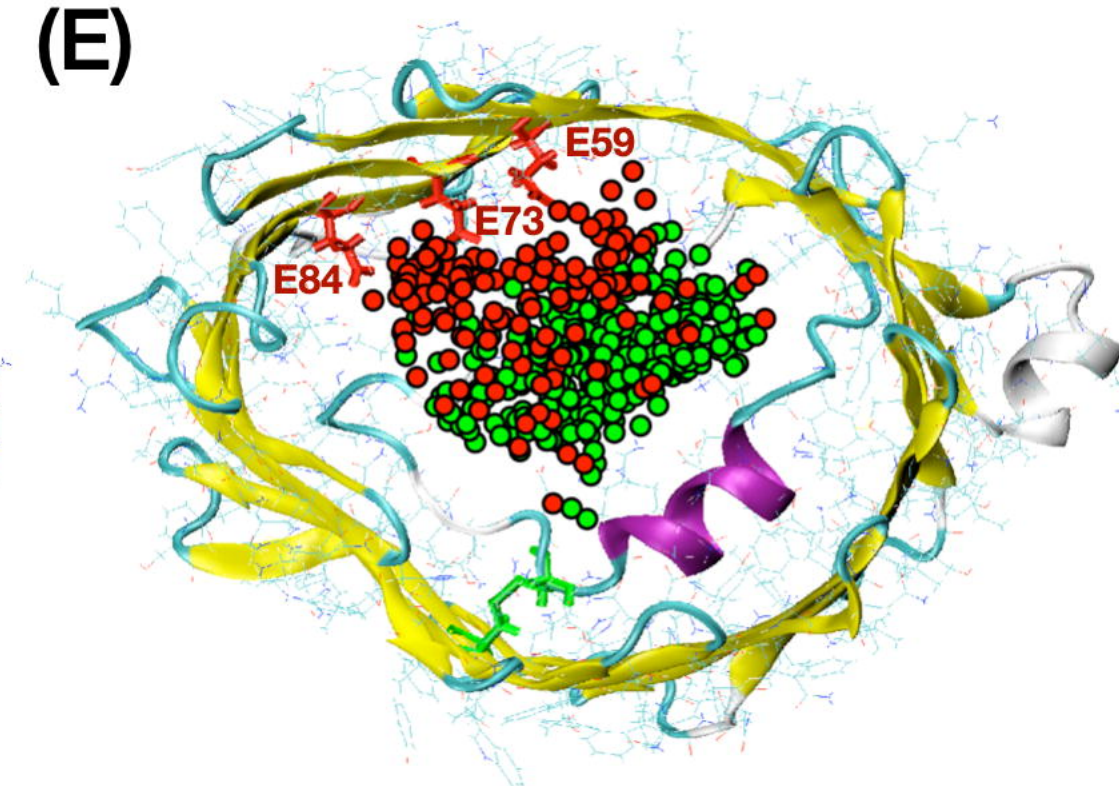

Source: https://www.biorxiv.org/content/10.1101/2020.09.24.311332v3.full.pdf
